# Supplementary material
Source: publisher figshare collection journal article supplement (https://rs.figshare.com/ndownloader/files/17842805)
Supplement: Supplementary file 1 [file 17842805]

30	0.9	0.3	1	1	0.03	0.04	0.4	0.2	10	1	519.53	0.00262
30	0.9	0.3	1	1	0.03	0.04	0.4	0	10	1	516.4	0.00176
30	0.9	0.4	1	1	0.03	0.04	0.4	0	10	1	535.4	0.00268
30	0.9	0.1	1	1	0.03	0.04	0.4	0	10	1	483.52	0.00174
30	0.8	0.9	1	1	0.03	0.04	0.4	0.1	10	1	679.01	0.06884
30	0.9	0.01	1	1	0.03	0.04	0.4	0.3	10	1	481	0.00227
30	0.9	0.4	1	1	0.03	0.04	0.4	0.2	10	1	539.65	0.00246
30	0.9	0.2	1	1	0.03	0.04	0.4	0.4	10	1	518.57	0.00253
30	0.9	0.1	1	1	0.03	0.04	0.4	0.3	10	1	492.03	0.0023
30	0.9	0.6	1	1	0.03	0.04	0.4	0.1	10	1	589.85	0.00402
30	0.9	0.01	1	1	0.03	0.04	0.4	0.4	10	1	486.65	0.00221
30	0.9	0.1	1	1	0.03	0.04	0.4	0.4	10	1	500.62	0.00248
30	0.9	0.01	1	1	0.03	0.04	0.4	0.5	10	1	488.48	0.00238
30	0.8	0.4	1	1	0.03	0.04	0.4	0.3	10	1	356.17	0.00815
30	0.9	0.1	1	1	0.03	0.04	0.4	0.5	10	1	502.5	0.00256
30	0.9	0.5	1	1	0.03	0.04	0.4	0.1	10	1	563.76	0.00331
30	0.9	0.5	1	1	0.03	0.04	0.4	0.6	10	1	579.64	0.00406
30	0.9	0.5	1	1	0.03	0.04	0.4	0.2	10	1	566.69	0.00316
30	0.9	0.6	1	1	0.03	0.04	0.4	0.8	10	1	612.21	0.00544
30	0.9	0.6	1	1	0.03	0.04	0.4	0.7	10	1	608.6	0.00499
30	0.9	0.2	1	1	0.03	0.04	0.4	0.9	10	1	534.51	0.00407
30	0.9	0.6	1	1	0.03	0.04	0.4	0.6	10	1	606.54	0.00486
30	0.9	0.01	1	1	0.03	0.04	0.4	0.6	10	1	492.92	0.00284
30	0.9	0.8	1	1	0.03	0.04	0.4	0.4	10	1	716.21	0.01353
30	0.8	0.5	1	1	0.03	0.04	0.4	0.4	10	1	369.46	0.00989
30	0.9	0.3	1	1	0.03	0.04	0.4	0.8	10	1	541.86	0.00345
30	0.8	0.5	1	1	0.03	0.04	0.4	0.3	10	1	372.97	0.00965
30	0.8	0.4	1	1	0.03	0.04	0.4	0.5	10	1	357.73	0.00868
30	0.8	0.5	1	1	0.03	0.04	0.4	0.7	10	1	374.23	0.01078
30	0.8	0.5	1	1	0.03	0.04	0.4	0.5	10	1	369.24	0.01002
30	0.9	0.7	1	1	0.03	0.04	0.4	0.6	10	1	651.15	0.00769
30	0.8	0.4	1	1	0.03	0.04	0.4	0.2	10	1	354.68	0.00839
30	0.8	0.4	1	1	0.03	0.04	0.4	0.6	10	1	359.14	0.00843
30	0.9	0.6	1	1	0.03	0.04	0.4	0.2	10	1	596.08	0.00409
30	0.8	0.3	1	1	0.03	0.04	0.4	0.1	10	1	345.4	0.00693
30	0.9	0.1	1	1	0.03	0.04	0.4	0.8	10	1	514.09	0.00334
30	0.8	0.7	1	1	0.03	0.04	0.4	0	10	1	430.04	0.01859
30	0.9	0.7	1	1	0.03	0.04	0.4	0.9	10	1	660.14	0.00834
30	0.9	0.3	1	1	0.03	0.04	0.4	0.7	10	1	539.28	0.00313
30	0.8	0.3	1	1	0.03	0.04	0.4	0.4	10	1	346.8	0.00718
30	0.8	0.3	1	1	0.03	0.04	0.4	0.5	10	1	344.89	0.00739
30	0.9	0.9	1	1	0.03	0.04	0.4	0.7	10	1	829.45	0.0329
30	0.8	0.2	1	1	0.03	0.04	0.4	0.3	10	1	334.7	0.0066
30	0.8	0.6	1	1	0.03	0.04	0.4	0.6	10	1	395.74	0.01355
30	0.8	0.3	1	1	0.03	0.04	0.4	0.7	10	1	346.92	0.0077
30	0.8	0.2	1	1	0.03	0.04	0.4	0	10	1	338.28	0.00649
30	0.8	0.2	1	1	0.03	0.04	0.4	0.1	10	1	334.46	0.00682
30	0.8	0.4	1	1	0.03	0.04	0.4	0.7	10	1	359.55	0.00879
30	0.8	0.7	1	1	0.03	0.04	0.4	0.8	10	1	431.6	0.01965
30	0.8	0.7	1	1	0.03	0.04	0.4	0.5	10	1	432.74	0.0204
30	0.8	0.6	1	1	0.03	0.04	0.4	0.5	10	1	393.7	0.01286
30	0.9	0.9	1	1	0.03	0.04	0.4	0.2	10	1	850.79	0.03328
30	0.8	0.2	1	1	0.03	0.04	0.4	0.2	10	1	337.3	0.00648
30	0.9	0.8	1	1	0.03	0.04	0.4	0.7	10	1	718.11	0.01438
30	0.9	0.8	1	1	0.03	0.04	0.4	0.6	10	1	724.8	0.01477
30	0.9	0.8	1	1	0.03	0.04	0.4	0.9	10	1	719.75	0.01479
30	0.9	0.6	1	1	0.03	0.04	0.4	0.9	10	1	613.24	0.00571
30	0.8	0.6	1	1	0.03	0.04	0.4	0	10	1	392.76	0.01248
30	0.8	0.2	1	1	0.03	0.04	0.4	0.6	10	1	340.29	0.00678
30	0.8	0.9	1	1	0.03	0.04	0.4	0.7	10	1	641.95	0.06124
30	0.8	0.8	1	1	0.03	0.04	0.4	0.7	10	1	495.32	0.03359
30	0.8	0.1	1	1	0.03	0.04	0.4	0.3	10	1	329.82	0.00606
30	0.8	0.8	1	1	0.03	0.04	0.4	0.3	10	1	493.98	0.03219
30	0.8	0.9	1	1	0.03	0.04	0.4	0.3	10	1	666.17	0.06685
30	0.8	0.9	1	1	0.03	0.04	0.4	0.5	10	1	657.95	0.06444
30	0.8	0.9	1	1	0.03	0.04	0.4	0	10	1	677.9	0.07
30	0.8	0.9	1	1	0.03	0.04	0.4	0.9	10	1	630.14	0.05925
30	0.8	0.9	1	1	0.03	0.04	0.4	0.4	10	1	658.12	0.06486
30	0.8	0.1	1	1	0.03	0.04	0.4	0.8	10	1	333.27	0.00674
30	0.8	0.01	1	1	0.03	0.04	0.4	0.8	10	1	330.81	0.00663
30	0.8	0.1	1	1	0.03	0.04	0.4	0.6	10	1	333.83	0.00722
30	0.8	0.1	1	1	0.03	0.04	0.4	0.9	10	1	335.81	0.00765
30	0.8	0.2	1	1	0.03	0.04	0.4	0.7	10	1	339.01	0.00697
30	0.9	0.7	1	1	0.03	0.04	0.4	0	10	1	643.7	0.00594
30	0.8	0.4	1	1	0.03	0.04	0.4	0.4	10	1	360.83	0.00826
30	0.8	0.01	1	1	0.03	0.04	0.4	0	10	1	322.79	0.00534
30	0.8	0.8	1	1	0.03	0.04	0.4	0.8	10	1	494.82	0.0334
30	0.8	0.3	1	1	0.03	0.04	0.4	0.6	10	1	348.41	0.00779
30	0.8	0.01	1	1	0.03	0.04	0.4	0.7	10	1	330.29	0.00723
30	0.8	0.01	1	1	0.03	0.04	0.4	0.4	10	1	325.2	0.00609
30	0.8	0.7	1	1	0.03	0.04	0.4	0.3	10	1	431.05	0.01911
30	0.9	0.4	1	1	0.03	0.04	0.4	0.8	10	1	552.48	0.00377
30	0.8	0.01	1	1	0.03	0.04	0.4	0.3	10	1	321.26	0.00597
30	0.9	0.01	1	1	0.03	0.04	0.4	0	10	1	471	0.00158
30	0.9	0.7	1	1	0.03	0.04	0.4	0.7	10	1	652.15	0.00818
30	0.7	0.7	1	1	0.03	0.04	0.4	0.9	10	1	351.44	0.03283
30	0.7	0.2	1	1	0.03	0.04	0.4	0.9	10	1	266.56	0.01351
30	0.8	0.5	1	1	0.03	0.04	0.4	0.8	10	1	375.81	0.01026
30	0.9	0.6	1	1	0.03	0.04	0.4	0.5	10	1	604.97	0.00497
30	0.8	0.8	1	1	0.03	0.04	0.4	0.5	10	1	498.52	0.03335
30	0.9	0.9	1	1	0.03	0.04	0.4	0.5	10	1	841.87	0.03423
30	0.7	0.01	1	1	0.03	0.04	0.4	0.2	10	1	253.11	0.01149
30	0.7	0.8	1	1	0.03	0.04	0.4	0.9	10	1	416.59	0.05056
30	0.9	0.6	1	1	0.03	0.04	0.4	0.3	10	1	594.32	0.00436
30	0.9	0.2	1	1	0.03	0.04	0.4	0	10	1	500.12	0.00188
30	0.7	0.5	1	1	0.03	0.04	0.4	0.6	10	1	296.46	0.0188
30	0.7	0.5	1	1	0.03	0.04	0.4	0.1	10	1	295.4	0.01923
30	0.7	0.5	1	1	0.03	0.04	0.4	0.5	10	1	294.73	0.01925
30	0.8	0.4	1	1	0.03	0.04	0.4	0.1	10	1	356.74	0.00807
30	0.7	0.5	1	1	0.03	0.04	0.4	0.3	10	1	299.17	0.01845
30	0.7	0.4	1	1	0.03	0.04	0.4	0.8	10	1	279.92	0.01582
30	0.8	0.3	1	1	0.03	0.04	0.4	0.2	10	1	345.22	0.00737
30	0.7	0.6	1	1	0.03	0.04	0.4	0.5	10	1	315.61	0.02344
30	0.7	0.3	1	1	0.03	0.04	0.4	0.5	10	1	272.93	0.01445
30	0.7	0.6	1	1	0.03	0.04	0.4	0.9	10	1	315.15	0.02335
30	0.7	0.7	1	1	0.03	0.04	0.4	0.2	10	1	351.02	0.03369
30	0.7	0.3	1	1	0.03	0.04	0.4	0.6	10	1	272.09	0.01431
30	0.7	0.4	1	1	0.03	0.04	0.4	0.4	10	1	281.06	0.01581
30	0.7	0.3	1	1	0.03	0.04	0.4	0.1	10	1	270.31	0.01443
30	0.7	0.6	1	1	0.03	0.04	0.4	0.2	10	1	314.95	0.02325
30	0.7	0.6	1	1	0.03	0.04	0.4	0.3	10	1	316.85	0.02381
30	0.7	0.5	1	1	0.03	0.04	0.4	0.7	10	1	297.51	0.01967
30	0.7	0.4	1	1	0.03	0.04	0.4	0.3	10	1	285.72	0.0167
30	0.7	0.7	1	1	0.03	0.04	0.4	0	10	1	353.71	0.03275
30	0.7	0.6	1	1	0.03	0.04	0.4	0.1	10	1	318.42	0.02358
30	0.7	0.2	1	1	0.03	0.04	0.4	0	10	1	263.36	0.01273
30	0.7	0.3	1	1	0.03	0.04	0.4	0	10	1	269.96	0.01385
30	0.7	0.6	1	1	0.03	0.04	0.4	0.8	10	1	318.64	0.02531
30	0.7	0.3	1	1	0.03	0.04	0.4	0.3	10	1	269.92	0.01385
30	0.7	0.1	1	1	0.03	0.04	0.4	0	10	1	257.52	0.0118
30	0.7	0.7	1	1	0.03	0.04	0.4	0.3	10	1	356.79	0.03421
30	0.7	0.6	1	1	0.03	0.04	0.4	0.4	10	1	317.4	0.02483
30	0.8	0.3	1	1	0.03	0.04	0.4	0	10	1	349.3	0.00748
30	0.7	0.6	1	1	0.03	0.04	0.4	0.6	10	1	320.52	0.02376
30	0.8	0.5	1	1	0.03	0.04	0.4	0.1	10	1	371.44	0.00978
30	0.7	0.6	1	1	0.03	0.04	0.4	0.7	10	1	317.05	0.02419
30	0.8	0.2	1	1	0.03	0.04	0.4	0.4	10	1	339.9	0.00642
30	0.8	0.6	1	1	0.03	0.04	0.4	0.8	10	1	393.92	0.01301
30	0.7	0.3	1	1	0.03	0.04	0.4	0.8	10	1	273.13	0.01445
30	0.8	0.4	1	1	0.03	0.04	0.4	0	10	1	355.66	0.00792
30	0.7	0.1	1	1	0.03	0.04	0.4	0.1	10	1	261.55	0.0121
30	0.7	0.5	1	1	0.03	0.04	0.4	0.8	10	1	298.79	0.02026
30	0.7	0.1	1	1	0.03	0.04	0.4	0.2	10	1	260.98	0.01208
30	0.7	0.4	1	1	0.03	0.04	0.4	0.1	10	1	285.64	0.01606
30	0.8	0.4	1	1	0.03	0.04	0.4	0.8	10	1	359.8	0.00915
30	0.7	0.7	1	1	0.03	0.04	0.4	0.4	10	1	350.59	0.03277
30	0.7	0.7	1	1	0.03	0.04	0.4	0.7	10	1	351.8	0.03379
30	0.7	0.1	1	1	0.03	0.04	0.4	0.4	10	1	262.05	0.01202
30	0.7	0.4	1	1	0.03	0.04	0.4	0.6	10	1	283.48	0.01639
30	0.9	0.01	1	1	0.03	0.04	0.4	0.9	10	1	512.96	0.00362
30	0.7	0.2	1	1	0.03	0.04	0.4	0.4	10	1	266.14	0.01324
30	0.8	0.3	1	1	0.03	0.04	0.4	0.3	10	1	348.11	0.0073
30	0.7	0.2	1	1	0.03	0.04	0.4	0.8	10	1	266.07	0.01304
30	0.7	0.4	1	1	0.03	0.04	0.4	0.2	10	1	281.62	0.0157
30	0.7	0.3	1	1	0.03	0.04	0.4	0.9	10	1	271.33	0.01471
30	0.8	0.7	1	1	0.03	0.04	0.4	0.4	10	1	428.55	0.01909
30	0.8	0.6	1	1	0.03	0.04	0.4	0.7	10	1	396.46	0.01359
30	0.7	0.4	1	1	0.03	0.04	0.4	0.5	10	1	283	0.01624
30	0.8	0.5	1	1	0.03	0.04	0.4	0	10	1	372.38	0.01014
30	0.7	0.9	1	1	0.03	0.04	0.4	0.8	10	1	578.91	0.0823
30	0.7	0.3	1	1	0.03	0.04	0.4	0.2	10	1	272.67	0.01391
30	0.8	0.5	1	1	0.03	0.04	0.4	0.9	10	1	374.53	0.01114
30	0.8	0.3	1	1	0.03	0.04	0.4	0.9	10	1	348.72	0.0084
30	0.8	0.5	1	1	0.03	0.04	0.4	0.6	10	1	372.02	0.01049
30	0.8	0.5	1	1	0.03	0.04	0.4	0.2	10	1	372.27	0.01
30	0.8	0.4	1	1	0.03	0.04	0.4	0.9	10	1	361.07	0.00907
30	0.8	0.9	1	1	0.03	0.04	0.4	0.6	10	1	656.53	0.0638
30	0.7	0.5	1	1	0.03	0.04	0.4	0	10	1	297.68	0.01922
30	0.8	0.1	1	1	0.03	0.04	0.4	0	10	1	327.2	0.0061
30	0.7	0.01	1	1	0.03	0.04	0.4	0	10	1	252.97	0.01097
30	0.8	0.2	1	1	0.03	0.04	0.4	0.8	10	1	339.72	0.00798
30	0.7	0.8	1	1	0.03	0.04	0.4	0.1	10	1	425.55	0.05335
30	0.9	0.01	1	1	0.03	0.04	0.4	0.1	10	1	473.73	0.00172
30	0.8	0.3	1	1	0.03	0.04	0.4	0.8	10	1	351.73	0.00769
30	0.9	0.1	1	1	0.03	0.04	0.4	0.1	10	1	482.45	0.00194
30	0.8	0.2	1	1	0.03	0.04	0.4	0.5	10	1	335.39	0.0069
30	0.9	0.7	1	1	0.03	0.04	0.4	0.8	10	1	659.3	0.00837
30	0.8	0.6	1	1	0.03	0.04	0.4	0.1	10	1	396.16	0.01277
30	0.7	0.01	1	1	0.03	0.04	0.4	0.8	10	1	254.06	0.01184
30	0.9	0.01	1	1	0.03	0.04	0.4	0.2	10	1	483.02	0.00203
30	0.7	0.8	1	1	0.03	0.04	0.4	0.8	10	1	417.84	0.05068
30	0.8	0.6	1	1	0.03	0.04	0.4	0.4	10	1	395.44	0.01321
30	0.7	0.8	1	1	0.03	0.04	0.4	0.6	10	1	416.6	0.05173
30	0.7	0.8	1	1	0.03	0.04	0.4	0.4	10	1	421.51	0.05273
30	0.7	0.8	1	1	0.03	0.04	0.4	0.2	10	1	422.66	0.05224
30	0.9	0.3	1	1	0.03	0.04	0.4	0.9	10	1	541.1	0.00366
30	0.99	0.2	1	1	0.03	0.04	0.4	0	10	1	1329.4	0.00119
30	0.8	0.6	1	1	0.03	0.04	0.4	0.9	10	1	396.76	0.0134
30	0.8	0.01	1	1	0.03	0.04	0.4	0.1	10	1	321.25	0.00572
30	0.8	0.7	1	1	0.03	0.04	0.4	0.6	10	1	428.67	0.01867
30	0.8	0.7	1	1	0.03	0.04	0.4	0.7	10	1	435.92	0.02028
30	0.8	0.6	1	1	0.03	0.04	0.4	0.3	10	1	392.7	0.0129
30	0.8	0.1	1	1	0.03	0.04	0.4	0.1	10	1	327.87	0.00586
30	0.8	0.6	1	1	0.03	0.04	0.4	0.2	10	1	394.22	0.0131
30	0.9	0.2	1	1	0.03	0.04	0.4	0.5	10	1	510.97	0.00296
30	0.8	0.1	1	1	0.03	0.04	0.4	0.7	10	1	336.61	0.00703
30	0.7	0.1	1	1	0.03	0.04	0.4	0.7	10	1	260.68	0.01283
30	0.8	0.7	1	1	0.03	0.04	0.4	0.9	10	1	431.27	0.02081
30	0.8	0.1	1	1	0.03	0.04	0.4	0.5	10	1	333.4	0.00675
30	0.8	0.1	1	1	0.03	0.04	0.4	0.2	10	1	329.27	0.00618
30	0.8	0.7	1	1	0.03	0.04	0.4	0.1	10	1	430.78	0.01875
30	0.8	0.8	1	1	0.03	0.04	0.4	0	10	1	508.52	0.03482
30	0.8	0.01	1	1	0.03	0.04	0.4	0.6	10	1	326.18	0.00641
30	0.8	0.1	1	1	0.03	0.04	0.4	0.4	10	1	331.65	0.00642
30	0.8	0.7	1	1	0.03	0.04	0.4	0.2	10	1	432.4	0.01908
30	0.9	0.2	1	1	0.03	0.04	0.4	0.2	10	1	503.53	0.0023
30	0.9	0.3	1	1	0.03	0.04	0.4	0.5	10	1	530.87	0.0027
30	0.8	0.2	1	1	0.03	0.04	0.4	0.9	10	1	346.26	0.00774
30	0.7	0.4	1	1	0.03	0.04	0.4	0.7	10	1	282.23	0.0166
30	0.9	0.4	1	1	0.03	0.04	0.4	0.1	10	1	542.02	0.00253
30	0.9	0.1	1	1	0.03	0.04	0.4	0.2	10	1	488.27	0.00208
30	0.9	0.3	1	1	0.03	0.04	0.4	0.4	10	1	526.73	0.00257
30	0.7	0.1	1	1	0.03	0.04	0.4	0.3	10	1	257.12	0.01207
30	0.9	0.2	1	1	0.03	0.04	0.4	0.1	10	1	506.14	0.00217
30	0.9	0.2	1	1	0.03	0.04	0.4	0.6	10	1	519.7	0.00296
30	0.9	0.3	1	1	0.03	0.04	0.4	0.1	10	1	521.33	0.0024
30	0.9	0.2	1	1	0.03	0.04	0.4	0.3	10	1	510.77	0.00223
30	0.9	0.4	1	1	0.03	0.04	0.4	0.7	10	1	553.84	0.00331
30	0.7	0.1	1	1	0.03	0.04	0.4	0.8	10	1	258.84	0.01186
30	0.9	0.1	1	1	0.03	0.04	0.4	0.9	10	1	514.58	0.00378
30	0.6	0.7	1	1	0.03	0.04	0.4	0	10	1	308.36	0.04495
30	0.9	0.2	1	1	0.03	0.04	0.4	0.7	10	1	524.59	0.00317
30	0.7	0.3	1	1	0.03	0.04	0.4	0.7	10	1	272.55	0.01459
30	0.9	0.4	1	1	0.03	0.04	0.4	0.6	10	1	553.61	0.00307
30	0.6	0.8	1	1	0.03	0.04	0.4	0	10	1	385.62	0.06868
30	0.8	0.01	1	1	0.03	0.04	0.4	0.2	10	1	322.54	0.00589
30	0.9	0.4	1	1	0.03	0.04	0.4	0.3	10	1	548.17	0.00271
30	0.7	0.4	1	1	0.03	0.04	0.4	0	10	1	284.44	0.01644
30	0.9	0.5	1	1	0.03	0.04	0.4	0.5	10	1	567.37	0.00356
30	0.9	0.2	1	1	0.03	0.04	0.4	0.8	10	1	523.55	0.00336
30	0.9	0.1	1	1	0.03	0.04	0.4	0.6	10	1	512.3	0.00294
30	0.7	0.9	1	1	0.03	0.04	0.4	0.9	10	1	577.7	0.08187
30	0.9	0.1	1	1	0.03	0.04	0.4	0.7	10	1	511.02	0.00316
30	0.8	0.8	1	1	0.03	0.04	0.4	0.2	10	1	490.92	0.03295
30	0.8	0.8	1	1	0.03	0.04	0.4	0.9	10	1	490.01	0.03224
30	0.9	0.5	1	1	0.03	0.04	0.4	0.9	10	1	586.38	0.00482
30	0.8	0.8	1	1	0.03	0.04	0.4	0.1	10	1	492.41	0.03298
30	0.8	0.01	1	1	0.03	0.04	0.4	0.5	10	1	327.93	0.00653
30	0.7	0.9	1	1	0.03	0.04	0.4	0	10	1	613.85	0.09513
30	0.7	0.9	1	1	0.03	0.04	0.4	0.3	10	1	599.59	0.08923
30	0.6	0.6	1	1	0.03	0.04	0.4	0.3	10	1	271.65	0.03317
30	0.9	0.5	1	1	0.03	0.04	0.4	0.3	10	1	568.2	0.00307
30	0.6	0.7	1	1	0.03	0.04	0.4	0.8	10	1	310.25	0.04525
30	0.8	0.01	1	1	0.03	0.04	0.4	0.9	10	1	330.4	0.00683
30	0.9	0.4	1	1	0.03	0.04	0.4	0.4	10	1	544.04	0.00269
30	0.9	0.6	1	1	0.03	0.04	0.4	0	10	1	591.47	0.00358
30	0.8	0.8	1	1	0.03	0.04	0.4	0.6	10	1	500.09	0.03286
30	0.9	0.3	1	1	0.03	0.04	0.4	0.6	10	1	532.61	0.00293
30	0.9	0.01	1	1	0.03	0.04	0.4	0.7	10	1	498.99	0.00299
30	0.7	0.9	1	1	0.03	0.04	0.4	0.2	10	1	610.3	0.09261
30	0.9	0.4	1	1	0.03	0.04	0.4	0.5	10	1	549.25	0.00313
30	0.6	0.5	1	1	0.03	0.04	0.4	0.3	10	1	251.42	0.02698
30	0.6	0.5	1	1	0.03	0.04	0.4	0	10	1	250.56	0.02622
30	0.7	0.1	1	1	0.03	0.04	0.4	0.6	10	1	260.62	0.01282
30	0.9	0.01	1	1	0.03	0.04	0.4	0.8	10	1	505.63	0.00309
30	0.7	0.5	1	1	0.03	0.04	0.4	0.4	10	1	296.35	0.01935
30	0.6	0.5	1	1	0.03	0.04	0.4	0.4	10	1	247.77	0.02678
30	0.6	0.6	1	1	0.03	0.04	0.4	0.7	10	1	273.38	0.03395
30	0.9	0.5	1	1	0.03	0.04	0.4	0.4	10	1	572.38	0.00349
30	0.6	0.8	1	1	0.03	0.04	0.4	0.4	10	1	380.2	0.06546
30	0.9	0.6	1	1	0.03	0.04	0.4	0.4	10	1	597.79	0.00414
30	0.7	0.9	1	1	0.03	0.04	0.4	0.4	10	1	601.45	0.09
30	0.7	0.01	1	1	0.03	0.04	0.4	0.4	10	1	256.37	0.01216
30	0.6	0.7	1	1	0.03	0.04	0.4	0.4	10	1	310.46	0.04467
30	0.9	0.5	1	1	0.03	0.04	0.4	0	10	1	561.2	0.00312
30	0.6	0.8	1	1	0.03	0.04	0.4	0.5	10	1	378.75	0.06632
30	0.6	0.8	1	1	0.03	0.04	0.4	0.7	10	1	374.93	0.06406
30	0.6	0.4	1	1	0.03	0.04	0.4	0	10	1	235.51	0.02253
30	0.6	0.9	1	1	0.03	0.04	0.4	0.1	10	1	573.94	0.11
30	0.6	0.9	1	1	0.03	0.04	0.4	0.2	10	1	577.38	0.10923
30	0.6	0.7	1	1	0.03	0.04	0.4	0.5	10	1	308.66	0.04436
30	0.6	0.6	1	1	0.03	0.04	0.4	0.6	10	1	271	0.03231
30	0.6	0.6	1	1	0.03	0.04	0.4	0	10	1	272.63	0.03281
30	0.9	0.7	1	1	0.03	0.04	0.4	0.1	10	1	639.12	0.00633
30	0.6	0.7	1	1	0.03	0.04	0.4	0.7	10	1	306.93	0.04404
30	0.8	0.8	1	1	0.03	0.04	0.4	0.4	10	1	502.48	0.03345
30	0.6	0.7	1	1	0.03	0.04	0.4	0.9	10	1	308.02	0.04475
30	0.9	0.9	1	1	0.03	0.04	0.4	0	10	1	845.98	0.0325
30	0.9	0.5	1	1	0.03	0.04	0.4	0.7	10	1	576.13	0.00412
30	0.6	0.6	1	1	0.03	0.04	0.4	0.5	10	1	272.81	0.03334
30	0.6	0.2	1	1	0.03	0.04	0.4	0.4	10	1	221.19	0.01938
30	0.9	0.5	1	1	0.03	0.04	0.4	0.8	10	1	579.9	0.00428
30	0.6	0.4	1	1	0.03	0.04	0.4	0.1	10	1	238.91	0.0237
30	0.99	0.01	1	1	0.03	0.04	0.4	0.1	10	1	1159.8	0.00166
30	0.6	0.5	1	1	0.03	0.04	0.4	0.8	10	1	251.93	0.02641
30	0.6	0.6	1	1	0.03	0.04	0.4	0.1	10	1	274.08	0.0342
30	0.6	0.2	1	1	0.03	0.04	0.4	0.1	10	1	223.48	0.01874
30	0.6	0.1	1	1	0.03	0.04	0.4	0	10	1	216.55	0.01765
30	0.6	0.2	1	1	0.03	0.04	0.4	0.3	10	1	219.77	0.01834
30	0.6	0.3	1	1	0.03	0.04	0.4	0.3	10	1	230.57	0.02141
30	0.6	0.2	1	1	0.03	0.04	0.4	0.5	10	1	221.09	0.01876
30	0.6	0.2	1	1	0.03	0.04	0.4	0	10	1	222.54	0.01926
30	0.6	0.01	1	1	0.03	0.04	0.4	0	10	1	209.66	0.01637
30	0.6	0.1	1	1	0.03	0.04	0.4	0.2	10	1	218.29	0.01759
30	0.6	0.4	1	1	0.03	0.04	0.4	0.2	10	1	237.31	0.02351
30	0.6	0.6	1	1	0.03	0.04	0.4	0.4	10	1	271.85	0.03325
30	0.6	0.01	1	1	0.03	0.04	0.4	0.7	10	1	212.89	0.01697
30	0.6	0.3	1	1	0.03	0.04	0.4	0.2	10	1	229.33	0.02108
30	0.6	0.1	1	1	0.03	0.04	0.4	0.4	10	1	218.03	0.01773
30	0.6	0.4	1	1	0.03	0.04	0.4	0.6	10	1	240.77	0.02279
30	0.7	0.2	1	1	0.03	0.04	0.4	0.2	10	1	267.39	0.01267
30	0.6	0.3	1	1	0.03	0.04	0.4	0.1	10	1	227.41	0.02055
30	0.6	0.01	1	1	0.03	0.04	0.4	0.4	10	1	213.47	0.0159
30	0.7	0.3	1	1	0.03	0.04	0.4	0.4	10	1	274.53	0.0139
30	0.6	0.2	1	1	0.03	0.04	0.4	0.6	10	1	223.96	0.01953
30	0.6	0.3	1	1	0.03	0.04	0.4	0.7	10	1	231.63	0.02206
30	0.6	0.5	1	1	0.03	0.04	0.4	0.7	10	1	254.71	0.02685
30	0.6	0.2	1	1	0.03	0.04	0.4	0.7	10	1	223.01	0.01917
30	0.7	0.2	1	1	0.03	0.04	0.4	0.1	10	1	266	0.01289
30	0.6	0.01	1	1	0.03	0.04	0.4	0.9	10	1	214.09	0.01772
30	0.7	0.5	1	1	0.03	0.04	0.4	0.2	10	1	295.92	0.01841
30	0.6	0.3	1	1	0.03	0.04	0.4	0.9	10	1	227.14	0.01967
30	0.99	0.1	1	1	0.03	0.04	0.4	0.5	10	1	1340.2	0.00325
30	0.7	0.2	1	1	0.03	0.04	0.4	0.6	10	1	265.96	0.0132
30	0.99	0.1	1	1	0.03	0.04	0.4	0.3	10	1	1289	0.00227
30	0.6	0.3	1	1	0.03	0.04	0.4	0.5	10	1	230.67	0.02115
30	0.7	0.01	1	1	0.03	0.04	0.4	0.7	10	1	254.96	0.01203
30	0.7	0.01	1	1	0.03	0.04	0.4	0.9	10	1	257.45	0.01203
30	0.6	0.8	1	1	0.03	0.04	0.4	0.9	10	1	376.09	0.06555
30	0.6	0.1	1	1	0.03	0.04	0.4	0.6	10	1	215.14	0.01662
30	0.6	0.4	1	1	0.03	0.04	0.4	0.7	10	1	237.71	0.02281
30	0.6	0.01	1	1	0.03	0.04	0.4	0.3	10	1	213.17	0.01661
30	0.9	0.7	1	1	0.03	0.04	0.4	0.2	10	1	643.75	0.00632
30	0.6	0.01	1	1	0.03	0.04	0.4	0.5	10	1	213.3	0.01758
30	0.7	0.1	1	1	0.03	0.04	0.4	0.9	10	1	261.09	0.01265
30	0.7	0.2	1	1	0.03	0.04	0.4	0.7	10	1	268.08	0.0138
30	0.7	0.4	1	1	0.03	0.04	0.4	0.9	10	1	281.89	0.01595
30	0.7	0.01	1	1	0.03	0.04	0.4	0.6	10	1	257.13	0.0119
30	0.7	0.7	1	1	0.03	0.04	0.4	0.8	10	1	345.32	0.03306
30	0.6	0.2	1	1	0.03	0.04	0.4	0.2	10	1	224	0.02009
30	0.6	0.8	1	1	0.03	0.04	0.4	0.6	10	1	381.37	0.06535
30	0.6	0.01	1	1	0.03	0.04	0.4	0.6	10	1	214.46	0.01686
30	0.6	0.01	1	1	0.03	0.04	0.4	0.2	10	1	212.62	0.01655
30	0.7	0.01	1	1	0.03	0.04	0.4	0.3	10	1	256.49	0.01145
30	0.7	0.2	1	1	0.03	0.04	0.4	0.5	10	1	266.48	0.01304
30	0.7	0.1	1	1	0.03	0.04	0.4	0.5	10	1	262.5	0.01268
30	0.6	0.01	1	1	0.03	0.04	0.4	0.8	10	1	215.3	0.01699
30	0.7	0.2	1	1	0.03	0.04	0.4	0.3	10	1	268.82	0.01345
30	0.6	0.1	1	1	0.03	0.04	0.4	0.9	10	1	218.37	0.0179
30	0.6	0.4	1	1	0.03	0.04	0.4	0.9	10	1	241.52	0.02393
30	0.9	0.7	1	1	0.03	0.04	0.4	0.3	10	1	648.45	0.00643
30	0.7	0.5	1	1	0.03	0.04	0.4	0.9	10	1	294.29	0.01941
30	0.6	0.6	1	1	0.03	0.04	0.4	0.8	10	1	275.3	0.03413
30	0.5	0.5	1	1	0.03	0.04	0.4	0.5	10	1	221.68	0.03289
30	0.6	0.4	1	1	0.03	0.04	0.4	0.4	10	1	239.61	0.02273
30	0.5	0.4	1	1	0.03	0.04	0.4	0.3	10	1	209.42	0.02862
30	0.9	0.7	1	1	0.03	0.04	0.4	0.4	10	1	645.06	0.00665
30	0.5	0.4	1	1	0.03	0.04	0.4	0.1	10	1	211.1	0.02869
30	0.7	0.01	1	1	0.03	0.04	0.4	0.5	10	1	254.67	0.01167
30	0.5	0.6	1	1	0.03	0.04	0.4	0.4	10	1	244.49	0.04117
30	0.9	0.7	1	1	0.03	0.04	0.4	0.5	10	1	650.39	0.0068
30	0.9	0.8	1	1	0.03	0.04	0.4	0.8	10	1	718.29	0.01514
30	0.7	0.6	1	1	0.03	0.04	0.4	0	10	1	315.12	0.02446
30	0.7	0.7	1	1	0.03	0.04	0.4	0.5	10	1	349.69	0.03282
30	0.5	0.3	1	1	0.03	0.04	0.4	0.4	10	1	200.9	0.02568
30	0.5	0.7	1	1	0.03	0.04	0.4	0.6	10	1	278.82	0.05232
30	0.6	0.5	1	1	0.03	0.04	0.4	0.9	10	1	252.63	0.02713
30	0.6	0.1	1	1	0.03	0.04	0.4	0.5	10	1	215.48	0.01741
30	0.6	0.3	1	1	0.03	0.04	0.4	0	10	1	227.15	0.02077
30	0.6	0.8	1	1	0.03	0.04	0.4	0.1	10	1	383.96	0.06805
30	0.9	0.9	1	1	0.03	0.04	0.4	0.8	10	1	838.73	0.03326
30	0.99	0.1	1	1	0.03	0.04	0.4	0.2	10	1	1260.1	0.00181
30	0.5	0.5	1	1	0.03	0.04	0.4	0.4	10	1	222.97	0.03374
30	0.5	0.4	1	1	0.03	0.04	0.4	0	10	1	210.09	0.02953
30	0.9	0.9	1	1	0.03	0.04	0.4	0.9	10	1	834.87	0.03333
30	0.8	0.9	1	1	0.03	0.04	0.4	0.2	10	1	672.1	0.06772
30	0.7	0.7	1	1	0.03	0.04	0.4	0.1	10	1	355.07	0.03367
30	0.6	0.1	1	1	0.03	0.04	0.4	0.1	10	1	218.37	0.01826
30	0.5	0.6	1	1	0.03	0.04	0.4	0.2	10	1	241.26	0.03964
30	0.5	0.5	1	1	0.03	0.04	0.4	0.7	10	1	220.95	0.03345
30	0.9	0.8	1	1	0.03	0.04	0.4	0.3	10	1	708.5	0.0128
30	0.5	0.1	1	1	0.03	0.04	0.4	0.9	10	1	189.48	0.02279
30	0.6	0.7	1	1	0.03	0.04	0.4	0.1	10	1	308.66	0.04416
30	0.5	0.01	1	1	0.03	0.04	0.4	0	10	1	185.94	0.02131
30	0.5	0.8	1	1	0.03	0.04	0.4	0.3	10	1	350.98	0.07533
30	0.5	0.5	1	1	0.03	0.04	0.4	0.8	10	1	224.39	0.03322
30	0.6	0.5	1	1	0.03	0.04	0.4	0.2	10	1	252.27	0.02642
30	0.9	0.8	1	1	0.03	0.04	0.4	0.2	10	1	709.64	0.0125
30	0.5	0.3	1	1	0.03	0.04	0.4	0.3	10	1	200.83	0.02636
30	0.6	0.9	1	1	0.03	0.04	0.4	0.3	10	1	563.86	0.10549
30	0.5	0.3	1	1	0.03	0.04	0.4	0.2	10	1	200.17	0.02663
30	0.5	0.4	1	1	0.03	0.04	0.4	0.4	10	1	211.35	0.02941
30	0.5	0.01	1	1	0.03	0.04	0.4	0.3	10	1	185.61	0.02137
30	0.7	0.7	1	1	0.03	0.04	0.4	0.6	10	1	353.29	0.03342
30	0.5	0.6	1	1	0.03	0.04	0.4	0.9	10	1	242.42	0.03949
30	0.9	0.8	1	1	0.03	0.04	0.4	0.5	10	1	717.52	0.0133
30	0.9	0.9	1	1	0.03	0.04	0.4	0.6	10	1	847.63	0.03304
30	0.5	0.3	1	1	0.03	0.04	0.4	0.5	10	1	198.53	0.02493
30	0.5	0.2	1	1	0.03	0.04	0.4	0.2	10	1	193.17	0.02422
30	0.5	0.4	1	1	0.03	0.04	0.4	0.9	10	1	210.97	0.0288
30	0.5	0.6	1	1	0.03	0.04	0.4	0.8	10	1	242.35	0.04057
30	0.5	0.6	1	1	0.03	0.04	0.4	0.3	10	1	246.39	0.04067
30	0.5	0.7	1	1	0.03	0.04	0.4	0	10	1	282.45	0.05385
30	0.5	0.7	1	1	0.03	0.04	0.4	0.3	10	1	280.83	0.05182
30	0.99	0.01	1	1	0.03	0.04	0.4	0.8	10	1	1352.9	0.00666
30	0.5	0.3	1	1	0.03	0.04	0.4	0.1	10	1	199.39	0.02512
30	0.5	0.2	1	1	0.03	0.04	0.4	0.4	10	1	194.38	0.02443
30	0.5	0.7	1	1	0.03	0.04	0.4	0.2	10	1	281.24	0.05315
30	0.5	0.1	1	1	0.03	0.04	0.4	0.4	10	1	188.61	0.02244
30	0.5	0.2	1	1	0.03	0.04	0.4	0.5	10	1	194.56	0.02436
30	0.5	0.3	1	1	0.03	0.04	0.4	0	10	1	200.4	0.0267
30	0.6	0.4	1	1	0.03	0.04	0.4	0.8	10	1	240.79	0.02364
30	0.5	0.2	1	1	0.03	0.04	0.4	0.6	10	1	195.13	0.02431
30	0.5	0.2	1	1	0.03	0.04	0.4	0.1	10	1	193.63	0.02412
30	0.5	0.7	1	1	0.03	0.04	0.4	0.4	10	1	281.39	0.05357
30	0.6	0.7	1	1	0.03	0.04	0.4	0.6	10	1	309.77	0.04549
30	0.7	0.01	1	1	0.03	0.04	0.4	0.1	10	1	255.31	0.01139
30	0.5	0.01	1	1	0.03	0.04	0.4	0.9	10	1	185.65	0.02159
30	0.6	0.2	1	1	0.03	0.04	0.4	0.9	10	1	222.21	0.01938
30	0.5	0.1	1	1	0.03	0.04	0.4	0.5	10	1	188.27	0.02173
30	0.7	0.8	1	1	0.03	0.04	0.4	0.3	10	1	419.6	0.05247
30	0.6	0.9	1	1	0.03	0.04	0.4	0	10	1	584.37	0.11305
30	0.5	0.2	1	1	0.03	0.04	0.4	0.3	10	1	195	0.02398
30	0.5	0.1	1	1	0.03	0.04	0.4	0.8	10	1	190.28	0.02306
30	0.7	0.8	1	1	0.03	0.04	0.4	0.5	10	1	424.06	0.05266
30	0.5	0.01	1	1	0.03	0.04	0.4	0.8	10	1	185.13	0.02085
30	0.5	0.8	1	1	0.03	0.04	0.4	0	10	1	358.64	0.07935
30	0.9	0.3	1	1	0.03	0.04	0.4	0.3	10	1	525.17	0.00284
30	0.5	0.8	1	1	0.03	0.04	0.4	0.4	10	1	353.66	0.07587
30	0.9	0.9	1	1	0.03	0.04	0.4	0.1	10	1	854.5	0.03375
30	0.6	0.9	1	1	0.03	0.04	0.4	0.7	10	1	546.27	0.09797
30	0.9	0.9	1	1	0.03	0.04	0.4	0.3	10	1	853.28	0.03303
30	0.5	0.8	1	1	0.03	0.04	0.4	0.1	10	1	358.64	0.07836
30	0.9	0.9	1	1	0.03	0.04	0.4	0.4	10	1	841.95	0.03301
30	0.5	0.1	1	1	0.03	0.04	0.4	0.2	10	1	188.74	0.02249
30	0.5	0.4	1	1	0.03	0.04	0.4	0.5	10	1	208.76	0.02852
30	0.6	0.1	1	1	0.03	0.04	0.4	0.8	10	1	218	0.01777
30	0.6	0.9	1	1	0.03	0.04	0.4	0.6	10	1	562.7	0.10173
30	0.5	0.8	1	1	0.03	0.04	0.4	0.5	10	1	351.67	0.07512
30	0.6	0.5	1	1	0.03	0.04	0.4	0.1	10	1	253.15	0.0276
30	0.99	0.3	1	1	0.03	0.04	0.4	0	10	1	1448.7	0.00138
30	0.6	0.01	1	1	0.03	0.04	0.4	0.1	10	1	214.59	0.01745
30	0.6	0.4	1	1	0.03	0.04	0.4	0.5	10	1	238.37	0.02264
30	0.7	0.8	1	1	0.03	0.04	0.4	0	10	1	424.67	0.05285
30	0.4	0.01	1	1	0.03	0.04	0.4	0.7	10	1	165.28	0.02472
30	0.6	0.3	1	1	0.03	0.04	0.4	0.4	10	1	226.99	0.02078
30	0.6	0.5	1	1	0.03	0.04	0.4	0.6	10	1	248.08	0.02605
30	0.7	0.8	1	1	0.03	0.04	0.4	0.7	10	1	416	0.05072
30	0.6	0.1	1	1	0.03	0.04	0.4	0.7	10	1	217.8	0.01775
30	0.7	0.9	1	1	0.03	0.04	0.4	0.1	10	1	610.26	0.09273
30	0.5	0.6	1	1	0.03	0.04	0.4	0.7	10	1	245.64	0.04103
30	0.6	0.5	1	1	0.03	0.04	0.4	0.5	10	1	250.73	0.02683
30	0.6	0.1	1	1	0.03	0.04	0.4	0.3	10	1	217.73	0.01796
30	0.6	0.2	1	1	0.03	0.04	0.4	0.8	10	1	222.31	0.01936
30	0.6	0.3	1	1	0.03	0.04	0.4	0.8	10	1	229.31	0.0212
30	0.6	0.4	1	1	0.03	0.04	0.4	0.3	10	1	239.34	0.0237
30	0.9	0.4	1	1	0.03	0.04	0.4	0.9	10	1	567.65	0.00424
30	0.4	0.01	1	1	0.03	0.04	0.4	0.4	10	1	165.89	0.02552
30	0.5	0.8	1	1	0.03	0.04	0.4	0.6	10	1	351.33	0.07536
30	0.6	0.8	1	1	0.03	0.04	0.4	0.8	10	1	375.88	0.06486
30	0.6	0.7	1	1	0.03	0.04	0.4	0.2	10	1	312.06	0.04563
30	0.5	0.2	1	1	0.03	0.04	0.4	0.9	10	1	191.48	0.02398
30	0.6	0.6	1	1	0.03	0.04	0.4	0.2	10	1	272.27	0.03442
30	0.4	0.3	1	1	0.03	0.04	0.4	0.9	10	1	180.46	0.03058
30	0.5	0.4	1	1	0.03	0.04	0.4	0.2	10	1	207.06	0.02924
30	0.5	0.4	1	1	0.03	0.04	0.4	0.8	10	1	207.41	0.02894
30	0.99	0.3	1	1	0.03	0.04	0.4	0.3	10	1	1514.5	0.00224
30	0.5	0.1	1	1	0.03	0.04	0.4	0.6	10	1	189.76	0.02259
30	0.5	0.6	1	1	0.03	0.04	0.4	0	10	1	243.59	0.04007
30	0.5	0.5	1	1	0.03	0.04	0.4	0.1	10	1	224.22	0.03299
30	0.5	0.3	1	1	0.03	0.04	0.4	0.6	10	1	197.51	0.0257
30	0.5	0.5	1	1	0.03	0.04	0.4	0.6	10	1	222.82	0.03428
30	0.5	0.3	1	1	0.03	0.04	0.4	0.7	10	1	199.77	0.02685
30	0.5	0.5	1	1	0.03	0.04	0.4	0.9	10	1	221.88	0.03355
30	0.5	0.4	1	1	0.03	0.04	0.4	0.7	10	1	209.31	0.02973
30	0.5	0.4	1	1	0.03	0.04	0.4	0.6	10	1	209.33	0.02939
30	0.6	0.9	1	1	0.03	0.04	0.4	0.9	10	1	542.81	0.09625
30	0.5	0.5	1	1	0.03	0.04	0.4	0	10	1	221.83	0.03297
30	0.5	0.5	1	1	0.03	0.04	0.4	0.2	10	1	223.18	0.03423
30	0.5	0.01	1	1	0.03	0.04	0.4	0.4	10	1	184.51	0.02092
30	0.5	0.1	1	1	0.03	0.04	0.4	0.7	10	1	189.4	0.02291
30	0.99	0.3	1	1	0.03	0.04	0.4	0.4	10	1	1548.1	0.00255
30	0.5	0.5	1	1	0.03	0.04	0.4	0.3	10	1	221.84	0.0324
30	0.6	0.8	1	1	0.03	0.04	0.4	0.3	10	1	380.95	0.0674
30	0.5	0.1	1	1	0.03	0.04	0.4	0.1	10	1	188.88	0.02305
30	0.5	0.01	1	1	0.03	0.04	0.4	0.2	10	1	185.87	0.02213
30	0.5	0.1	1	1	0.03	0.04	0.4	0	10	1	190.06	0.02356
30	0.5	0.3	1	1	0.03	0.04	0.4	0.8	10	1	201.13	0.02643
30	0.5	0.3	1	1	0.03	0.04	0.4	0.9	10	1	201.97	0.02595
30	0.5	0.1	1	1	0.03	0.04	0.4	0.3	10	1	189	0.02248
30	0.5	0.01	1	1	0.03	0.04	0.4	0.1	10	1	184.83	0.02118
30	0.5	0.2	1	1	0.03	0.04	0.4	0.8	10	1	192.24	0.02358
30	0.6	0.8	1	1	0.03	0.04	0.4	0.2	10	1	382.26	0.0674
30	0.6	0.6	1	1	0.03	0.04	0.4	0.9	10	1	270.92	0.03297
30	0.5	0.2	1	1	0.03	0.04	0.4	0	10	1	194.12	0.02445
30	0.5	0.6	1	1	0.03	0.04	0.4	0.1	10	1	244.26	0.04049
30	0.5	0.01	1	1	0.03	0.04	0.4	0.5	10	1	186.87	0.02158
30	0.5	0.2	1	1	0.03	0.04	0.4	0.7	10	1	194.9	0.02392
30	0.3	0.2	1	1	0.03	0.04	0.4	0	10	1	157.94	0.03159
30	0.8	0.9	1	1	0.03	0.04	0.4	0.8	10	1	639.17	0.06074
30	0.5	0.01	1	1	0.03	0.04	0.4	0.6	10	1	187.58	0.02233
30	0.5	0.6	1	1	0.03	0.04	0.4	0.5	10	1	245.57	0.04179
30	0.5	0.9	1	1	0.03	0.04	0.4	0	10	1	553.9	0.12166
30	0.5	0.01	1	1	0.03	0.04	0.4	0.7	10	1	185.79	0.02179
30	0.5	0.9	1	1	0.03	0.04	0.4	0.6	10	1	531	0.11118
30	0.3	0.4	1	1	0.03	0.04	0.4	0	10	1	172.25	0.03684
30	0.5	0.9	1	1	0.03	0.04	0.4	0.4	10	1	540.93	0.11527
30	0.3	0.5	1	1	0.03	0.04	0.4	0.1	10	1	185.76	0.04146
30	0.99	0.6	1	1	0.03	0.04	0.4	0	10	1	2092.3	0.00158
30	0.3	0.5	1	1	0.03	0.04	0.4	0.5	10	1	186.23	0.04184
30	0.7	0.9	1	1	0.03	0.04	0.4	0.7	10	1	582.89	0.08506
30	0.3	0.6	1	1	0.03	0.04	0.4	0.3	10	1	204.95	0.0484
30	0.4	0.8	1	1	0.03	0.04	0.4	0	10	1	331.25	0.08426
30	0.3	0.4	1	1	0.03	0.04	0.4	0.2	10	1	174.74	0.03749
30	0.3	0.7	1	1	0.03	0.04	0.4	0.3	10	1	244.49	0.06451
30	0.3	0.5	1	1	0.03	0.04	0.4	0.7	10	1	184.56	0.04214
30	0.3	0.6	1	1	0.03	0.04	0.4	0.1	10	1	208.82	0.04992
30	0.3	0.6	1	1	0.03	0.04	0.4	0.4	10	1	207.35	0.0502
30	0.3	0.5	1	1	0.03	0.04	0.4	0	10	1	184.9	0.04191
30	0.99	0.3	1	1	0.03	0.04	0.4	0.6	10	1	1587.4	0.0034
30	0.3	0.4	1	1	0.03	0.04	0.4	0.4	10	1	172.24	0.03661
30	0.3	0.1	1	1	0.03	0.04	0.4	0.1	10	1	153.93	0.029
30	0.5	0.6	1	1	0.03	0.04	0.4	0.6	10	1	245.67	0.0404
30	0.3	0.6	1	1	0.03	0.04	0.4	0.5	10	1	207.72	0.04948
30	0.3	0.3	1	1	0.03	0.04	0.4	0.1	10	1	165.41	0.03387
30	0.6	0.3	1	1	0.03	0.04	0.4	0.6	10	1	231.55	0.02102
30	0.3	0.5	1	1	0.03	0.04	0.4	0.8	10	1	184.94	0.04098
30	0.3	0.1	1	1	0.03	0.04	0.4	0.4	10	1	151.79	0.02933
30	0.3	0.3	1	1	0.03	0.04	0.4	0.2	10	1	163.57	0.03309
30	0.3	0.6	1	1	0.03	0.04	0.4	0.7	10	1	207.05	0.05006
30	0.3	0.4	1	1	0.03	0.04	0.4	0.6	10	1	173.85	0.03772
30	0.3	0.4	1	1	0.03	0.04	0.4	0.8	10	1	172.12	0.03556
30	0.3	0.6	1	1	0.03	0.04	0.4	0.8	10	1	208.53	0.05034
30	0.3	0.6	1	1	0.03	0.04	0.4	0.9	10	1	206.84	0.04961
30	0.3	0.3	1	1	0.03	0.04	0.4	0.6	10	1	163.59	0.03337
30	0.3	0.4	1	1	0.03	0.04	0.4	0.7	10	1	172.53	0.03615
30	0.3	0.01	1	1	0.03	0.04	0.4	0.6	10	1	150.28	0.02809
30	0.3	0.8	1	1	0.03	0.04	0.4	0.8	10	1	314.23	0.08579
30	0.3	0.7	1	1	0.03	0.04	0.4	0.7	10	1	241.66	0.06243
30	0.3	0.2	1	1	0.03	0.04	0.4	0.2	10	1	158.18	0.031
30	0.3	0.8	1	1	0.03	0.04	0.4	0.7	10	1	317.37	0.08646
30	0.5	0.7	1	1	0.03	0.04	0.4	0.8	10	1	277.79	0.05232
30	0.5	0.8	1	1	0.03	0.04	0.4	0.8	10	1	348.08	0.07352
30	0.7	0.9	1	1	0.03	0.04	0.4	0.6	10	1	584.4	0.08503
30	0.3	0.7	1	1	0.03	0.04	0.4	0.8	10	1	239.76	0.06099
30	0.3	0.2	1	1	0.03	0.04	0.4	0.3	10	1	158.08	0.03022
30	0.3	0.2	1	1	0.03	0.04	0.4	0.4	10	1	159.18	0.0302
30	0.3	0.4	1	1	0.03	0.04	0.4	0.9	10	1	172.72	0.0362
30	0.5	0.7	1	1	0.03	0.04	0.4	0.1	10	1	283.32	0.05428
30	0.5	0.7	1	1	0.03	0.04	0.4	0.5	10	1	280.14	0.05325
30	0.3	0.2	1	1	0.03	0.04	0.4	0.9	10	1	157.73	0.03036
30	0.3	0.2	1	1	0.03	0.04	0.4	0.6	10	1	159.37	0.03147
30	0.5	0.7	1	1	0.03	0.04	0.4	0.7	10	1	281.33	0.05343
30	0.3	0.3	1	1	0.03	0.04	0.4	0.9	10	1	162.08	0.03301
30	0.3	0.7	1	1	0.03	0.04	0.4	0.9	10	1	246.26	0.06376
30	0.3	0.1	1	1	0.03	0.04	0.4	0	10	1	153.56	0.02915
30	0.4	0.01	1	1	0.03	0.04	0.4	0.3	10	1	163.45	0.02426
30	0.9	0.8	1	1	0.03	0.04	0.4	0	10	1	708.52	0.01181
30	0.3	0.1	1	1	0.03	0.04	0.4	0.3	10	1	152.06	0.02953
30	0.3	0.3	1	1	0.03	0.04	0.4	0.3	10	1	163.56	0.03367
30	0.4	0.01	1	1	0.03	0.04	0.4	0.2	10	1	167.01	0.02551
30	0.4	0.2	1	1	0.03	0.04	0.4	0	10	1	173.94	0.02794
30	0.4	0.2	1	1	0.03	0.04	0.4	0.1	10	1	173.96	0.02771
30	0.4	0.01	1	1	0.03	0.04	0.4	0.9	10	1	164.91	0.02388
30	0.4	0.01	1	1	0.03	0.04	0.4	0.8	10	1	164.87	0.02484
30	0.3	0.1	1	1	0.03	0.04	0.4	0.8	10	1	154.6	0.02991
30	0.99	0.2	1	1	0.03	0.04	0.4	0.4	10	1	1426	0.00264
30	0.3	0.1	1	1	0.03	0.04	0.4	0.9	10	1	153.3	0.02883
30	0.4	0.01	1	1	0.03	0.04	0.4	0.5	10	1	165.41	0.0255
30	0.4	0.01	1	1	0.03	0.04	0.4	0.6	10	1	165.84	0.02476
30	0.3	0.01	1	1	0.03	0.04	0.4	0.1	10	1	151.43	0.02882
30	0.3	0.7	1	1	0.03	0.04	0.4	0.1	10	1	245.75	0.06501
30	0.4	0.01	1	1	0.03	0.04	0.4	0.1	10	1	164.34	0.0244
30	0.3	0.01	1	1	0.03	0.04	0.4	0.2	10	1	152.4	0.02807
30	0.3	0.01	1	1	0.03	0.04	0.4	0.3	10	1	150.68	0.02747
30	0.4	0.3	1	1	0.03	0.04	0.4	0	10	1	179.26	0.02946
30	0.4	0.1	1	1	0.03	0.04	0.4	0.2	10	1	167.67	0.02618
30	0.3	0.01	1	1	0.03	0.04	0.4	0.4	10	1	150.98	0.02754
30	0.4	0.3	1	1	0.03	0.04	0.4	0.4	10	1	180.08	0.03016
30	0.4	0.01	1	1	0.03	0.04	0.4	0	10	1	166.8	0.02494
30	0.4	0.1	1	1	0.03	0.04	0.4	0.3	10	1	169.79	0.02615
30	0.3	0.7	1	1	0.03	0.04	0.4	0	10	1	247.62	0.06603
30	0.3	0.01	1	1	0.03	0.04	0.4	0	10	1	151.07	0.02745
30	0.4	0.4	1	1	0.03	0.04	0.4	0.9	10	1	187.02	0.03288
30	0.4	0.3	1	1	0.03	0.04	0.4	0.3	10	1	178.6	0.02944
30	0.5	0.7	1	1	0.03	0.04	0.4	0.9	10	1	280.51	0.05369
30	0.7	0.9	1	1	0.03	0.04	0.4	0.5	10	1	591.49	0.08638
30	0.4	0.2	1	1	0.03	0.04	0.4	0.6	10	1	171.89	0.02755
30	0.3	0.7	1	1	0.03	0.04	0.4	0.4	10	1	246.65	0.06586
30	0.4	0.1	1	1	0.03	0.04	0.4	0.1	10	1	169.91	0.02622
30	0.4	0.1	1	1	0.03	0.04	0.4	0	10	1	170.46	0.02584
30	0.4	0.2	1	1	0.03	0.04	0.4	0.2	10	1	173.14	0.02775
30	0.4	0.2	1	1	0.03	0.04	0.4	0.7	10	1	174.75	0.02853
30	0.4	0.2	1	1	0.03	0.04	0.4	0.3	10	1	173.95	0.02704
30	0.4	0.2	1	1	0.03	0.04	0.4	0.8	10	1	171.41	0.02706
30	0.4	0.1	1	1	0.03	0.04	0.4	0.7	10	1	166.87	0.02576
30	0.4	0.1	1	1	0.03	0.04	0.4	0.8	10	1	167.69	0.02653
30	0.4	0.1	1	1	0.03	0.04	0.4	0.9	10	1	167.98	0.02628
30	0.4	0.3	1	1	0.03	0.04	0.4	0.7	10	1	179.25	0.02973
30	0.4	0.3	1	1	0.03	0.04	0.4	0.8	10	1	179.73	0.03035
30	0.4	0.2	1	1	0.03	0.04	0.4	0.9	10	1	174.08	0.02773
30	0.3	0.01	1	1	0.03	0.04	0.4	0.8	10	1	150.96	0.02814
30	0.4	0.4	1	1	0.03	0.04	0.4	0	10	1	188.04	0.03306
30	0.4	0.1	1	1	0.03	0.04	0.4	0.6	10	1	170.03	0.02626
30	0.4	0.1	1	1	0.03	0.04	0.4	0.5	10	1	168.57	0.02658
30	0.4	0.3	1	1	0.03	0.04	0.4	0.2	10	1	178.95	0.02943
30	0.4	0.4	1	1	0.03	0.04	0.4	0.4	10	1	188.78	0.03317
30	0.4	0.3	1	1	0.03	0.04	0.4	0.6	10	1	177.7	0.02963
30	0.4	0.4	1	1	0.03	0.04	0.4	0.3	10	1	188.98	0.0333
30	0.4	0.3	1	1	0.03	0.04	0.4	0.5	10	1	178.27	0.03015
30	0.4	0.3	1	1	0.03	0.04	0.4	0.1	10	1	180.14	0.0309
30	0.4	0.1	1	1	0.03	0.04	0.4	0.4	10	1	167.95	0.0258
30	0.4	0.2	1	1	0.03	0.04	0.4	0.4	10	1	172.31	0.02748
30	0.3	0.3	1	1	0.03	0.04	0.4	0.7	10	1	164.5	0.03355
30	0.9	0.8	1	1	0.03	0.04	0.4	0.1	10	1	717.06	0.01266
30	0.4	0.2	1	1	0.03	0.04	0.4	0.5	10	1	173.78	0.02741
30	0.3	0.01	1	1	0.03	0.04	0.4	0.5	10	1	150.93	0.0272
30	0.3	0.8	1	1	0.03	0.04	0.4	0.4	10	1	316.77	0.08622
30	0.4	0.4	1	1	0.03	0.04	0.4	0.7	10	1	185.51	0.03205
30	0.4	0.4	1	1	0.03	0.04	0.4	0.8	10	1	187.74	0.03287
30	0.3	0.8	1	1	0.03	0.04	0.4	0.5	10	1	315.26	0.08606
30	0.4	0.5	1	1	0.03	0.04	0.4	0.3	10	1	200.26	0.03721
30	0.4	0.5	1	1	0.03	0.04	0.4	0.4	10	1	200.12	0.03783
30	0.4	0.5	1	1	0.03	0.04	0.4	0.9	10	1	201.87	0.03827
30	0.3	0.8	1	1	0.03	0.04	0.4	0	10	1	321.45	0.09032
30	0.4	0.4	1	1	0.03	0.04	0.4	0.2	10	1	187.47	0.03325
30	0.3	0.8	1	1	0.03	0.04	0.4	0.3	10	1	322.59	0.08944
30	0.4	0.5	1	1	0.03	0.04	0.4	0.8	10	1	198.59	0.03728
30	0.3	0.4	1	1	0.03	0.04	0.4	0.3	10	1	173.04	0.03618
30	0.4	0.5	1	1	0.03	0.04	0.4	0.2	10	1	200.76	0.03705
30	0.4	0.5	1	1	0.03	0.04	0.4	0.1	10	1	201.56	0.03692
30	0.4	0.4	1	1	0.03	0.04	0.4	0.1	10	1	188.07	0.03298
30	0.4	0.5	1	1	0.03	0.04	0.4	0.7	10	1	200.94	0.03849
30	0.4	0.4	1	1	0.03	0.04	0.4	0.5	10	1	189.35	0.0338
30	0.4	0.4	1	1	0.03	0.04	0.4	0.6	10	1	189.48	0.03352
30	0.3	0.8	1	1	0.03	0.04	0.4	0.1	10	1	317.38	0.08804
30	0.3	0.2	1	1	0.03	0.04	0.4	0.7	10	1	158.16	0.03045
30	0.99	0.4	1	1	0.03	0.04	0.4	0.5	10	1	1682	0.00249
30	0.4	0.5	1	1	0.03	0.04	0.4	0	10	1	201.64	0.03866
30	0.3	0.01	1	1	0.03	0.04	0.4	0.9	10	1	150.72	0.02752
30	0.4	0.9	1	1	0.03	0.04	0.4	0.2	10	1	514.93	0.12332
30	0.4	0.5	1	1	0.03	0.04	0.4	0.5	10	1	200.48	0.03762
30	0.4	0.5	1	1	0.03	0.04	0.4	0.6	10	1	201.97	0.03758
30	0.3	0.5	1	1	0.03	0.04	0.4	0.2	10	1	184.74	0.04129
30	0.3	0.9	1	1	0.03	0.04	0.4	0.8	10	1	482.76	0.11479
30	0.4	0.6	1	1	0.03	0.04	0.4	0.5	10	1	221.4	0.04536
30	0.4	0.6	1	1	0.03	0.04	0.4	0.6	10	1	222.2	0.04513
30	0.3	0.2	1	1	0.03	0.04	0.4	0.5	10	1	158.77	0.03067
30	0.3	0.9	1	1	0.03	0.04	0.4	0.1	10	1	508.86	0.13185
30	0.4	0.6	1	1	0.03	0.04	0.4	0.9	10	1	222.07	0.04503
30	0.2	0.4	1	1	0.03	0.04	0.4	0.5	10	1	162	0.0402
30	0.2	0.6	1	1	0.03	0.04	0.4	0	10	1	195.53	0.0536
30	0.3	0.9	1	1	0.03	0.04	0.4	0.5	10	1	501.87	0.12393
30	0.4	0.6	1	1	0.03	0.04	0.4	0.7	10	1	219.08	0.04456
30	0.4	0.6	1	1	0.03	0.04	0.4	0.8	10	1	218.81	0.04488
30	0.2	0.3	1	1	0.03	0.04	0.4	0.5	10	1	151.49	0.03607
30	0.4	0.9	1	1	0.03	0.04	0.4	0.1	10	1	531.55	0.12774
30	0.5	0.9	1	1	0.03	0.04	0.4	0.2	10	1	547.7	0.11896
30	0.3	0.9	1	1	0.03	0.04	0.4	0.2	10	1	502.34	0.12974
30	0.2	0.3	1	1	0.03	0.04	0.4	0.9	10	1	151.95	0.03656
30	0.2	0.4	1	1	0.03	0.04	0.4	0.7	10	1	162.72	0.04079
30	0.5	0.8	1	1	0.03	0.04	0.4	0.7	10	1	351.67	0.07431
30	0.3	0.9	1	1	0.03	0.04	0.4	0.4	10	1	497.98	0.12547
30	0.3	0.4	1	1	0.03	0.04	0.4	0.1	10	1	173.58	0.03602
30	0.4	0.6	1	1	0.03	0.04	0.4	0.1	10	1	221.13	0.04513
30	0.4	0.6	1	1	0.03	0.04	0.4	0.2	10	1	221.62	0.04591
30	0.2	0.1	1	1	0.03	0.04	0.4	0.2	10	1	142.09	0.03118
30	0.2	0.1	1	1	0.03	0.04	0.4	0.3	10	1	141.21	0.03133
30	0.2	0.2	1	1	0.03	0.04	0.4	0.8	10	1	148.03	0.03307
30	0.2	0.6	1	1	0.03	0.04	0.4	0.5	10	1	197.08	0.05287
30	0.3	0.3	1	1	0.03	0.04	0.4	0	10	1	162.67	0.03325
30	0.2	0.1	1	1	0.03	0.04	0.4	0.1	10	1	144.23	0.03232
30	0.3	0.6	1	1	0.03	0.04	0.4	0.2	10	1	206.77	0.04946
30	0.3	0.9	1	1	0.03	0.04	0.4	0	10	1	513.82	0.13393
30	0.3	0.2	1	1	0.03	0.04	0.4	0.1	10	1	156.56	0.03138
30	0.4	0.9	1	1	0.03	0.04	0.4	0.8	10	1	496.29	0.11182
30	0.99	0.01	1	1	0.03	0.04	0.4	0.5	10	1	1256.9	0.0039
30	0.4	0.6	1	1	0.03	0.04	0.4	0.4	10	1	222.9	0.04595
30	0.2	0.01	1	1	0.03	0.04	0.4	0	10	1	142.25	0.03061
30	0.4	0.6	1	1	0.03	0.04	0.4	0.3	10	1	223.52	0.04556
30	0.3	0.7	1	1	0.03	0.04	0.4	0.6	10	1	244.43	0.06378
30	0.3	0.5	1	1	0.03	0.04	0.4	0.4	10	1	186.97	0.04229
30	0.5	0.8	1	1	0.03	0.04	0.4	0.9	10	1	346.25	0.07346
30	0.5	0.8	1	1	0.03	0.04	0.4	0.2	10	1	355.08	0.07724
30	0.99	0.5	1	1	0.03	0.04	0.4	0	10	1	1819	0.00151
30	0.3	0.4	1	1	0.03	0.04	0.4	0.5	10	1	173.67	0.03772
30	0.3	0.5	1	1	0.03	0.04	0.4	0.6	10	1	184.86	0.04184
30	0.3	0.1	1	1	0.03	0.04	0.4	0.6	10	1	152.88	0.02897
30	0.3	0.9	1	1	0.03	0.04	0.4	0.3	10	1	503.56	0.12787
30	0.2	0.01	1	1	0.03	0.04	0.4	0.4	10	1	141.79	0.03051
30	0.3	0.3	1	1	0.03	0.04	0.4	0.4	10	1	163.44	0.03321
30	0.3	0.5	1	1	0.03	0.04	0.4	0.3	10	1	186.01	0.04141
30	0.3	0.5	1	1	0.03	0.04	0.4	0.9	10	1	187.31	0.04176
30	0.99	0.3	1	1	0.03	0.04	0.4	0.8	10	1	1636.5	0.00476
30	0.3	0.8	1	1	0.03	0.04	0.4	0.6	10	1	314.69	0.0861
30	0.2	0.7	1	1	0.03	0.04	0.4	0.9	10	1	230.89	0.06563
30	0.2	0.2	1	1	0.03	0.04	0.4	0	10	1	146.32	0.03401
30	0.2	0.3	1	1	0.03	0.04	0.4	0	10	1	152.47	0.03497
30	0.2	0.3	1	1	0.03	0.04	0.4	0.3	10	1	151.79	0.0358
30	0.2	0.4	1	1	0.03	0.04	0.4	0.3	10	1	159.99	0.0391
30	0.2	0.4	1	1	0.03	0.04	0.4	0	10	1	160.79	0.03958
30	0.2	0.4	1	1	0.03	0.04	0.4	0.2	10	1	159.92	0.03964
30	0.2	0.3	1	1	0.03	0.04	0.4	0.2	10	1	150.46	0.03571
30	0.3	0.1	1	1	0.03	0.04	0.4	0.2	10	1	152.64	0.02814
30	0.2	0.5	1	1	0.03	0.04	0.4	0.2	10	1	173.27	0.04389
30	0.2	0.4	1	1	0.03	0.04	0.4	0.6	10	1	162.44	0.03986
30	0.2	0.3	1	1	0.03	0.04	0.4	0.8	10	1	151.98	0.03547
30	0.2	0.2	1	1	0.03	0.04	0.4	0.4	10	1	147.04	0.0335
30	0.2	0.2	1	1	0.03	0.04	0.4	0.5	10	1	145.89	0.03318
30	0.2	0.2	1	1	0.03	0.04	0.4	0.2	10	1	146.9	0.03345
30	0.2	0.2	1	1	0.03	0.04	0.4	0.3	10	1	147.24	0.03374
30	0.2	0.2	1	1	0.03	0.04	0.4	0.7	10	1	145.35	0.03206
30	0.2	0.3	1	1	0.03	0.04	0.4	0.1	10	1	152.68	0.03569
30	0.2	0.1	1	1	0.03	0.04	0.4	0	10	1	145.11	0.03219
30	0.2	0.4	1	1	0.03	0.04	0.4	0.9	10	1	161.87	0.0389
30	0.2	0.2	1	1	0.03	0.04	0.4	0.9	10	1	147.19	0.03413
30	0.2	0.4	1	1	0.03	0.04	0.4	0.8	10	1	162.84	0.03992
30	0.2	0.5	1	1	0.03	0.04	0.4	0.6	10	1	174.02	0.04461
30	0.2	0.5	1	1	0.03	0.04	0.4	0.7	10	1	172.6	0.0446
30	0.3	0.3	1	1	0.03	0.04	0.4	0.5	10	1	165.89	0.03379
30	0.3	0.3	1	1	0.03	0.04	0.4	0.8	10	1	163.78	0.03388
30	0.4	0.7	1	1	0.03	0.04	0.4	0.5	10	1	259.42	0.05839
30	0.2	0.1	1	1	0.03	0.04	0.4	0.5	10	1	141.88	0.03165
30	0.2	0.2	1	1	0.03	0.04	0.4	0.1	10	1	144.92	0.03289
30	0.3	0.1	1	1	0.03	0.04	0.4	0.5	10	1	151.78	0.02831
30	0.2	0.1	1	1	0.03	0.04	0.4	0.4	10	1	143.71	0.03221
30	0.6	0.9	1	1	0.03	0.04	0.4	0.4	10	1	566.65	0.10426
30	0.4	0.7	1	1	0.03	0.04	0.4	0.4	10	1	260.33	0.05826
30	0.2	0.5	1	1	0.03	0.04	0.4	0.9	10	1	172.78	0.04519
30	0.2	0.6	1	1	0.03	0.04	0.4	0.9	10	1	194.3	0.05238
30	0.2	0.01	1	1	0.03	0.04	0.4	0.2	10	1	140.56	0.03034
30	0.2	0.1	1	1	0.03	0.04	0.4	0.6	10	1	141.51	0.0301
30	0.4	0.7	1	1	0.03	0.04	0.4	0	10	1	258.01	0.05777
30	0.4	0.7	1	1	0.03	0.04	0.4	0.1	10	1	258.06	0.05894
30	0.2	0.1	1	1	0.03	0.04	0.4	0.9	10	1	142.32	0.03177
30	0.2	0.01	1	1	0.03	0.04	0.4	0.1	10	1	141.7	0.0301
30	0.2	0.6	1	1	0.03	0.04	0.4	0.8	10	1	194.73	0.05259
30	0.4	0.7	1	1	0.03	0.04	0.4	0.9	10	1	254.92	0.05888
30	0.99	0.5	1	1	0.03	0.04	0.4	0.2	10	1	1835.7	0.00195
30	0.2	0.01	1	1	0.03	0.04	0.4	0.3	10	1	142.28	0.03012
30	0.3	0.2	1	1	0.03	0.04	0.4	0.8	10	1	157.76	0.03099
30	0.3	0.6	1	1	0.03	0.04	0.4	0.6	10	1	206.6	0.0493
30	0.2	0.6	1	1	0.03	0.04	0.4	0.7	10	1	193.96	0.05163
30	0.4	0.7	1	1	0.03	0.04	0.4	0.8	10	1	257.51	0.0572
30	0.2	0.01	1	1	0.03	0.04	0.4	0.8	10	1	141	0.03032
30	0.2	0.01	1	1	0.03	0.04	0.4	0.6	10	1	141.65	0.03078
30	0.5	0.9	1	1	0.03	0.04	0.4	0.1	10	1	547.04	0.11989
30	0.2	0.1	1	1	0.03	0.04	0.4	0.8	10	1	143.43	0.0318
30	0.3	0.1	1	1	0.03	0.04	0.4	0.7	10	1	154.37	0.02869
30	0.2	0.6	1	1	0.03	0.04	0.4	0.2	10	1	197.02	0.05444
30	0.3	0.01	1	1	0.03	0.04	0.4	0.7	10	1	149.35	0.02663
30	0.3	0.6	1	1	0.03	0.04	0.4	0	10	1	210.1	0.05125
30	0.2	0.01	1	1	0.03	0.04	0.4	0.5	10	1	140.63	0.03001
30	0.2	0.4	1	1	0.03	0.04	0.4	0.1	10	1	160.36	0.03966
30	0.4	0.7	1	1	0.03	0.04	0.4	0.6	10	1	257.79	0.05829
30	0.4	0.7	1	1	0.03	0.04	0.4	0.7	10	1	258.23	0.05867
30	0.4	0.7	1	1	0.03	0.04	0.4	0.3	10	1	258.33	0.05826
30	0.3	0.8	1	1	0.03	0.04	0.4	0.9	10	1	311.17	0.08307
30	0.4	0.7	1	1	0.03	0.04	0.4	0.2	10	1	261.12	0.05958
30	0.99	0.01	1	1	0.03	0.04	0.4	0.2	10	1	1193.3	0.00191
30	0.99	0.01	1	1	0.03	0.04	0.4	0.3	10	1	1206.4	0.00232
30	0.8	0.99	1	1	0.03	0.04	0.4	0.2	10	1	2080.8	0.10732
30	0.6	0.9	1	1	0.03	0.04	0.4	0.8	10	1	550.14	0.09763
30	0.6	0.9	1	1	0.03	0.04	0.4	0.5	10	1	557.92	0.10301
30	0.1	0.2	1	1	0.03	0.04	0.4	0.5	10	1	136.35	0.03508
30	0.5	0.9	1	1	0.03	0.04	0.4	0.8	10	1	526.61	0.10784
30	0.99	0.5	1	1	0.03	0.04	0.4	0.7	10	1	1929.3	0.00364
30	0.8	0.99	1	1	0.03	0.04	0.4	0.9	10	1	1805.8	0.08317
30	0.8	0.99	1	1	0.03	0.04	0.4	0.3	10	1	2056.9	0.104
30	0.99	0.4	1	1	0.03	0.04	0.4	0.9	10	1	1776.7	0.00536
30	0.1	0.3	1	1	0.03	0.04	0.4	0	10	1	142.09	0.0373
30	0.2	0.3	1	1	0.03	0.04	0.4	0.4	10	1	152.43	0.03596
30	0.1	0.3	1	1	0.03	0.04	0.4	0.3	10	1	144.09	0.03892
30	0.1	0.1	1	1	0.03	0.04	0.4	0.7	10	1	136.28	0.0331
30	0.1	0.3	1	1	0.03	0.04	0.4	0.5	10	1	142.98	0.0376
30	0.4	0.6	1	1	0.03	0.04	0.4	0	10	1	226.04	0.04664
30	0.1	0.3	1	1	0.03	0.04	0.4	0.4	10	1	144.79	0.0388
30	0.1	0.4	1	1	0.03	0.04	0.4	0.5	10	1	151.78	0.04155
30	0.1	0.4	1	1	0.03	0.04	0.4	0.7	10	1	152.77	0.04135
30	0.3	0.7	1	1	0.03	0.04	0.4	0.5	10	1	243.77	0.06315
30	0.3	0.7	1	1	0.03	0.04	0.4	0.2	10	1	245.28	0.06422
30	0.1	0.4	1	1	0.03	0.04	0.4	0.9	10	1	150.59	0.0419
30	0.1	0.5	1	1	0.03	0.04	0.4	0	10	1	165.39	0.04708
30	0.1	0.3	1	1	0.03	0.04	0.4	0.8	10	1	143.35	0.03849
30	0.1	0.01	1	1	0.03	0.04	0.4	0.2	10	1	139.18	0.03213
30	0.4	0.8	1	1	0.03	0.04	0.4	0.7	10	1	333.73	0.08217
30	0.1	0.01	1	1	0.03	0.04	0.4	0.6	10	1	138.66	0.032
30	0.2	0.8	1	1	0.03	0.04	0.4	0.2	10	1	310.31	0.09405
30	0.1	0.2	1	1	0.03	0.04	0.4	0.6	10	1	139.42	0.03599
30	0.2	0.8	1	1	0.03	0.04	0.4	0.5	10	1	299.41	0.08935
30	0.1	0.01	1	1	0.03	0.04	0.4	0.5	10	1	139.91	0.03248
30	0.1	0.2	1	1	0.03	0.04	0.4	0.2	10	1	137.49	0.03505
30	0.1	0.5	1	1	0.03	0.04	0.4	0.1	10	1	163.68	0.04575
30	0.1	0.2	1	1	0.03	0.04	0.4	0.3	10	1	137.6	0.03582
30	0.1	0.2	1	1	0.03	0.04	0.4	0.8	10	1	136.52	0.03448
30	0.99	0.5	1	1	0.03	0.04	0.4	0.1	10	1	1834.7	0.00153
30	0.2	0.5	1	1	0.03	0.04	0.4	0.8	10	1	172.99	0.0445
30	0.1	0.1	1	1	0.03	0.04	0.4	0	10	1	135.18	0.03338
30	0.2	0.8	1	1	0.03	0.04	0.4	0.6	10	1	304.62	0.0909
30	0.1	0.3	1	1	0.03	0.04	0.4	0.9	10	1	145.17	0.03912
30	0.1	0.1	1	1	0.03	0.04	0.4	0.3	10	1	136.19	0.03413
30	0.2	0.8	1	1	0.03	0.04	0.4	0.7	10	1	302.19	0.08834
30	0.1	0.6	1	1	0.03	0.04	0.4	0.1	10	1	186.84	0.05547
30	0.1	0.1	1	1	0.03	0.04	0.4	0.6	10	1	137.09	0.03311
30	0.1	0.2	1	1	0.03	0.04	0.4	0.9	10	1	138.95	0.03471
30	0.1	0.6	1	1	0.03	0.04	0.4	0.6	10	1	185.8	0.05508
30	0.1	0.2	1	1	0.03	0.04	0.4	0.4	10	1	137.03	0.03446
30	0.1	0.6	1	1	0.03	0.04	0.4	0.9	10	1	188.76	0.05658
30	0.3	0.9	1	1	0.03	0.04	0.4	0.7	10	1	485.58	0.11813
30	0.2	0.6	1	1	0.03	0.04	0.4	0.1	10	1	195.08	0.05374
30	0.99	0.5	1	1	0.03	0.04	0.4	0.8	10	1	1939.7	0.00428
30	0.6	0.99	1	1	0.03	0.04	0.4	0.4	10	1	1594.3	0.12594
30	0.1	0.01	1	1	0.03	0.04	0.4	0.1	10	1	140.84	0.03178
30	0.1	0.01	1	1	0.03	0.04	0.4	0	10	1	139.38	0.03191
30	0.1	0.01	1	1	0.03	0.04	0.4	0.8	10	1	137.99	0.03176
30	0.1	0.01	1	1	0.03	0.04	0.4	0.3	10	1	137.96	0.03195
30	0.1	0.6	1	1	0.03	0.04	0.4	0.4	10	1	186.31	0.05557
30	0.1	0.01	1	1	0.03	0.04	0.4	0.9	10	1	140.43	0.03179
30	0.1	0.01	1	1	0.03	0.04	0.4	0.7	10	1	138.06	0.03174
30	0.1	0.7	1	1	0.03	0.04	0.4	0.2	10	1	220.57	0.06966
30	0.1	0.7	1	1	0.03	0.04	0.4	0.6	10	1	223.85	0.0694
30	0.1	0.7	1	1	0.03	0.04	0.4	0.4	10	1	221.72	0.07048
30	0.2	0.01	1	1	0.03	0.04	0.4	0.7	10	1	140.38	0.03033
30	0.2	0.4	1	1	0.03	0.04	0.4	0.4	10	1	160.74	0.03892
30	0.1	0.7	1	1	0.03	0.04	0.4	0.7	10	1	224.3	0.06998
30	0.2	0.3	1	1	0.03	0.04	0.4	0.7	10	1	151.47	0.03559
30	0.4	0.8	1	1	0.03	0.04	0.4	0.1	10	1	336.16	0.08433
30	0.4	0.8	1	1	0.03	0.04	0.4	0.8	10	1	325.26	0.07959
30	0.1	0.1	1	1	0.03	0.04	0.4	0.4	10	1	135.15	0.03307
30	0.2	0.1	1	1	0.03	0.04	0.4	0.7	10	1	141.72	0.03136
30	0.1	0.4	1	1	0.03	0.04	0.4	0.1	10	1	151.7	0.04181
30	0.1	0.7	1	1	0.03	0.04	0.4	0.3	10	1	220.66	0.06907
30	0.4	0.8	1	1	0.03	0.04	0.4	0.5	10	1	330.39	0.0813
30	0.2	0.01	1	1	0.03	0.04	0.4	0.9	10	1	141.28	0.03042
30	0.2	0.5	1	1	0.03	0.04	0.4	0	10	1	174.86	0.04484
30	0.4	0.8	1	1	0.03	0.04	0.4	0.9	10	1	331.88	0.08051
30	0.01	0.6	1	1	0.03	0.04	0.4	0.9	10	1	177.22	0.05726
30	0.2	0.5	1	1	0.03	0.04	0.4	0.1	10	1	174.5	0.0453
30	0.4	0.8	1	1	0.03	0.04	0.4	0.6	10	1	333.38	0.08186
30	0.2	0.5	1	1	0.03	0.04	0.4	0.4	10	1	173.45	0.04317
30	0.6	0.99	1	1	0.03	0.04	0.4	0.8	10	1	1438.5	0.10503
30	0.7	0.99	1	1	0.03	0.04	0.4	0.8	10	1	1620	0.09938
30	0.01	0.2	1	1	0.03	0.04	0.4	0	10	1	131.37	0.0358
30	0.9	0.99	1	1	0.03	0.04	0.4	0.9	10	1	2064.5	0.0619
30	0.01	0.3	1	1	0.03	0.04	0.4	0.5	10	1	137.59	0.03934
30	0.01	0.3	1	1	0.03	0.04	0.4	0.7	10	1	137.68	0.03941
30	0.01	0.2	1	1	0.03	0.04	0.4	0.6	10	1	132.33	0.03647
30	0.2	0.5	1	1	0.03	0.04	0.4	0.3	10	1	174.57	0.04428
30	0.01	0.4	1	1	0.03	0.04	0.4	0	10	1	144.12	0.04378
30	0.01	0.4	1	1	0.03	0.04	0.4	0.4	10	1	144.43	0.04264
30	0.4	0.8	1	1	0.03	0.04	0.4	0.4	10	1	334.18	0.08369
30	0.01	0.2	1	1	0.03	0.04	0.4	0.2	10	1	133.88	0.03715
30	0.01	0.4	1	1	0.03	0.04	0.4	0.1	10	1	143.65	0.04306
30	0.4	0.8	1	1	0.03	0.04	0.4	0.3	10	1	333.19	0.08368
30	0.01	0.2	1	1	0.03	0.04	0.4	0.4	10	1	133.01	0.03726
30	0.4	0.8	1	1	0.03	0.04	0.4	0.2	10	1	335.66	0.0842
30	0.01	0.1	1	1	0.03	0.04	0.4	0	10	1	136.31	0.03434
30	0.01	0.2	1	1	0.03	0.04	0.4	0.8	10	1	133.32	0.03767
30	0.01	0.3	1	1	0.03	0.04	0.4	0.3	10	1	138.02	0.03957
30	0.01	0.1	1	1	0.03	0.04	0.4	0.2	10	1	136.53	0.03505
30	0.01	0.5	1	1	0.03	0.04	0.4	0	10	1	156.96	0.0476
30	0.1	0.1	1	1	0.03	0.04	0.4	0.9	10	1	135.25	0.03366
30	0.01	0.4	1	1	0.03	0.04	0.4	0.2	10	1	147.87	0.04385
30	0.01	0.1	1	1	0.03	0.04	0.4	0.1	10	1	135.3	0.03471
30	0.4	0.9	1	1	0.03	0.04	0.4	0.9	10	1	493.04	0.11003
30	0.01	0.7	1	1	0.03	0.04	0.4	0.3	10	1	213.42	0.07046
30	0.01	0.7	1	1	0.03	0.04	0.4	0.7	10	1	211.94	0.06997
30	0.01	0.1	1	1	0.03	0.04	0.4	0.3	10	1	133.6	0.03345
30	0.5	0.9	1	1	0.03	0.04	0.4	0.5	10	1	538.81	0.11288
30	0.01	0.2	1	1	0.03	0.04	0.4	0.9	10	1	133.82	0.03753
30	0.2	0.5	1	1	0.03	0.04	0.4	0.5	10	1	174.83	0.04491
30	0.01	0.5	1	1	0.03	0.04	0.4	0.6	10	1	156.96	0.04765
30	0.01	0.5	1	1	0.03	0.04	0.4	0.1	10	1	158.27	0.0493
30	0.01	0.5	1	1	0.03	0.04	0.4	0.5	10	1	157.26	0.04789
30	0.01	0.5	1	1	0.03	0.04	0.4	0.8	10	1	157.55	0.0491
30	0.01	0.5	1	1	0.03	0.04	0.4	0.4	10	1	157.46	0.04806
30	0.01	0.5	1	1	0.03	0.04	0.4	0.9	10	1	157.22	0.04815
30	0.01	0.5	1	1	0.03	0.04	0.4	0.2	10	1	157.34	0.04903
30	0.01	0.5	1	1	0.03	0.04	0.4	0.7	10	1	158.55	0.04889
30	0.01	0.1	1	1	0.03	0.04	0.4	0.5	10	1	135.01	0.03413
30	0.2	0.6	1	1	0.03	0.04	0.4	0.4	10	1	192.28	0.05148
30	0.01	0.4	1	1	0.03	0.04	0.4	0.3	10	1	144.98	0.0433
30	0.1	0.4	1	1	0.03	0.04	0.4	0.8	10	1	152.2	0.04145
30	0.01	0.5	1	1	0.03	0.04	0.4	0.3	10	1	155.56	0.04793
30	0.3	0.8	1	1	0.03	0.04	0.4	0.2	10	1	321.16	0.08926
30	0.1	0.8	1	1	0.03	0.04	0.4	0	10	1	299.62	0.09809
30	0.1	0.8	1	1	0.03	0.04	0.4	0.3	10	1	293.33	0.09369
30	0.2	0.6	1	1	0.03	0.04	0.4	0.6	10	1	193.07	0.05157
30	0.1	0.1	1	1	0.03	0.04	0.4	0.5	10	1	136.27	0.03439
30	0.01	0.6	1	1	0.03	0.04	0.4	0.4	10	1	180.51	0.05889
30	0.01	0.6	1	1	0.03	0.04	0.4	0.2	10	1	179.4	0.05684
30	0.01	0.6	1	1	0.03	0.04	0.4	0	10	1	178.28	0.05752
30	0.01	0.6	1	1	0.03	0.04	0.4	0.1	10	1	180.8	0.05835
30	0.1	0.2	1	1	0.03	0.04	0.4	0.1	10	1	136.25	0.03517
30	0.1	0.3	1	1	0.03	0.04	0.4	0.2	10	1	142.67	0.03735
30	0.1	0.8	1	1	0.03	0.04	0.4	0.1	10	1	297.86	0.09639
30	0.99	0.5	1	1	0.03	0.04	0.4	0.4	10	1	1880	0.00247
30	0.1	0.8	1	1	0.03	0.04	0.4	0.2	10	1	297.26	0.09584
30	0.1	0.6	1	1	0.03	0.04	0.4	0.5	10	1	186.24	0.05601
30	0.01	0.6	1	1	0.03	0.04	0.4	0.6	10	1	177.32	0.05747
30	0.01	0.2	1	1	0.03	0.04	0.4	0.7	10	1	131.12	0.03611
30	0.1	0.8	1	1	0.03	0.04	0.4	0.6	10	1	292.44	0.09284
30	0.1	0.2	1	1	0.03	0.04	0.4	0	10	1	139.1	0.03564
30	0.2	0.6	1	1	0.03	0.04	0.4	0.3	10	1	195.09	0.05326
30	0.1	0.4	1	1	0.03	0.04	0.4	0.6	10	1	150.7	0.04071
30	0.1	0.8	1	1	0.03	0.04	0.4	0.5	10	1	293.61	0.09252
30	0.1	0.3	1	1	0.03	0.04	0.4	0.1	10	1	141.85	0.0377
30	0.2	0.2	1	1	0.03	0.04	0.4	0.6	10	1	145.19	0.03197
30	0.1	0.4	1	1	0.03	0.04	0.4	0.4	10	1	149.68	0.04107
30	0.1	0.4	1	1	0.03	0.04	0.4	0.3	10	1	152.08	0.04194
30	0.3	0.9	1	1	0.03	0.04	0.4	0.6	10	1	487.94	0.11917
30	0.5	0.9	1	1	0.03	0.04	0.4	0.7	10	1	527.6	0.10803
30	0.01	0.6	1	1	0.03	0.04	0.4	0.5	10	1	176.43	0.05607
30	0.1	0.6	1	1	0.03	0.04	0.4	0.2	10	1	187.87	0.05607
30	0.01	0.8	1	1	0.03	0.04	0.4	0.1	10	1	286.81	0.09767
30	0.2	0.3	1	1	0.03	0.04	0.4	0.6	10	1	149.34	0.03584
30	0.1	0.5	1	1	0.03	0.04	0.4	0.2	10	1	165.38	0.04752
30	0.1	0.4	1	1	0.03	0.04	0.4	0	10	1	151.07	0.04235
30	0.1	0.5	1	1	0.03	0.04	0.4	0.3	10	1	164.23	0.0465
30	0.5	0.9	1	1	0.03	0.04	0.4	0.9	10	1	520.02	0.10506
30	0.2	0.7	1	1	0.03	0.04	0.4	0.5	10	1	229.35	0.06594
30	0.1	0.3	1	1	0.03	0.04	0.4	0.7	10	1	142.4	0.03831
30	0.01	0.01	1	1	0.03	0.04	0.4	0.5	10	1	209.85	0.03328
30	0.1	0.3	1	1	0.03	0.04	0.4	0.6	10	1	143.03	0.03785
30	0.1	0.1	1	1	0.03	0.04	0.4	0.1	10	1	136.31	0.03353
30	0.1	0.5	1	1	0.03	0.04	0.4	0.4	10	1	165.3	0.04724
30	0.2	0.9	1	1	0.03	0.04	0.4	0.3	10	1	486.35	0.13039
30	0.1	0.1	1	1	0.03	0.04	0.4	0.8	10	1	136.15	0.03364
30	0.01	0.3	1	1	0.03	0.04	0.4	0.2	10	1	136.17	0.03886
30	0.2	0.7	1	1	0.03	0.04	0.4	0.4	10	1	229.12	0.06608
30	0.1	0.5	1	1	0.03	0.04	0.4	0.8	10	1	162.53	0.04567
30	0.2	0.7	1	1	0.03	0.04	0.4	0.8	10	1	232.82	0.06627
30	0.1	0.5	1	1	0.03	0.04	0.4	0.9	10	1	163.52	0.04681
30	0.2	0.7	1	1	0.03	0.04	0.4	0.2	10	1	230.72	0.06637
30	0.1	0.8	1	1	0.03	0.04	0.4	0.4	10	1	296.04	0.09469
30	0.2	0.7	1	1	0.03	0.04	0.4	0.1	10	1	234.29	0.0688
30	0.01	0.2	1	1	0.03	0.04	0.4	0.1	10	1	131.66	0.03683
30	0.2	0.7	1	1	0.03	0.04	0.4	0	10	1	235.62	0.06855
30	0.1	0.5	1	1	0.03	0.04	0.4	0.5	10	1	164.48	0.04725
30	0.1	0.2	1	1	0.03	0.04	0.4	0.7	10	1	138.86	0.03636
30	0.1	0.5	1	1	0.03	0.04	0.4	0.6	10	1	165.27	0.04733
30	0.2	0.9	1	1	0.03	0.04	0.4	0.1	10	1	489.19	0.13454
30	0.01	0.7	1	1	0.03	0.04	0.4	0.9	10	1	214.23	0.06951
30	0.2	0.7	1	1	0.03	0.04	0.4	0.3	10	1	232.03	0.06798
30	0.1	0.6	1	1	0.03	0.04	0.4	0.8	10	1	183.4	0.05395
30	0.1	0.5	1	1	0.03	0.04	0.4	0.7	10	1	164.65	0.04629
30	0.2	0.9	1	1	0.03	0.04	0.4	0.8	10	1	465.32	0.11691
30	0.1	0.6	1	1	0.03	0.04	0.4	0.7	10	1	184.4	0.05528
30	0.2	0.7	1	1	0.03	0.04	0.4	0.7	10	1	227.57	0.06603
30	0.2	0.7	1	1	0.03	0.04	0.4	0.6	10	1	229.68	0.06664
30	0.01	0.01	1	1	0.03	0.04	0.4	0.4	10	1	207.58	0.03259
30	0.1	0.01	1	1	0.03	0.04	0.4	0.4	10	1	139.82	0.03269
30	0.3	0.9	1	1	0.03	0.04	0.4	0.9	10	1	478.2	0.11243
30	0.01	0.01	1	1	0.03	0.04	0.4	0	10	1	211.14	0.03338
30	0.01	0.01	1	1	0.03	0.04	0.4	0.1	10	1	211.47	0.03299
30	0.1	0.6	1	1	0.03	0.04	0.4	0	10	1	186.64	0.05735
30	0.99	0.6	1	1	0.03	0.04	0.4	0.1	10	1	2108.7	0.00189
30	0.1	0.1	1	1	0.03	0.04	0.4	0.2	10	1	134.53	0.03261
30	0.01	0.3	1	1	0.03	0.04	0.4	0.6	10	1	137.12	0.03987
30	0.2	0.9	1	1	0.03	0.04	0.4	0	10	1	491.28	0.13718
30	0.01	0.3	1	1	0.03	0.04	0.4	0.1	10	1	137	0.04114
30	0.01	0.6	1	1	0.03	0.04	0.4	0.3	10	1	178.68	0.05779
30	0.01	0.3	1	1	0.03	0.04	0.4	0	10	1	137.28	0.04026
30	0.2	0.9	1	1	0.03	0.04	0.4	0.5	10	1	481.79	0.12588
30	0.01	0.3	1	1	0.03	0.04	0.4	0.8	10	1	137.17	0.03989
30	0.5	0.99	1	1	0.03	0.04	0.4	0.3	10	1	1473.6	0.13596
30	0.01	0.8	1	1	0.03	0.04	0.4	0.7	10	1	281.07	0.09198
30	0.01	0.3	1	1	0.03	0.04	0.4	0.9	10	1	138.13	0.04084
30	0.01	0.3	1	1	0.03	0.04	0.4	0.4	10	1	137.56	0.03994
30	0.1	0.6	1	1	0.03	0.04	0.4	0.3	10	1	186.19	0.05595
30	0.01	0.01	1	1	0.03	0.04	0.4	0.6	10	1	211.01	0.03339
30	0.01	0.2	1	1	0.03	0.04	0.4	0.3	10	1	133.44	0.03645
30	0.01	0.4	1	1	0.03	0.04	0.4	0.5	10	1	145.5	0.04383
30	0.1	0.8	1	1	0.03	0.04	0.4	0.8	10	1	289.47	0.09154
30	0.01	0.8	1	1	0.03	0.04	0.4	0.3	10	1	285.93	0.09668
30	0.01	0.2	1	1	0.03	0.04	0.4	0.5	10	1	135.07	0.03761
30	0.3	0.99	1	1	0.03	0.04	0.4	0.9	10	1	1061.5	0.10048
30	0.01	0.4	1	1	0.03	0.04	0.4	0.9	10	1	147.03	0.04325
30	0.01	0.1	1	1	0.03	0.04	0.4	0.4	10	1	136.43	0.03439
30	0.01	0.4	1	1	0.03	0.04	0.4	0.8	10	1	147.41	0.04385
30	0.2	0.9	1	1	0.03	0.04	0.4	0.6	10	1	474.27	0.12294
30	0.1	0.4	1	1	0.03	0.04	0.4	0.2	10	1	150.87	0.04203
30	0.01	0.1	1	1	0.03	0.04	0.4	0.8	10	1	134.03	0.0347
30	0.01	0.1	1	1	0.03	0.04	0.4	0.9	10	1	135.36	0.03519
30	0.01	0.1	1	1	0.03	0.04	0.4	0.7	10	1	137.91	0.03521
30	0.01	0.1	1	1	0.03	0.04	0.4	0.6	10	1	136.83	0.03519
30	0.1	0.7	1	1	0.03	0.04	0.4	0	10	1	221.15	0.07053
30	0.99	0.4	1	1	0.03	0.04	0.4	0.2	10	1	1642.5	0.00185
30	0.3	0.99	1	1	0.03	0.04	0.4	0.8	10	1	1093.1	0.10773
30	0.1	0.9	1	1	0.03	0.04	0.4	0.9	10	1	442.95	0.11364
30	0.2	0.8	1	1	0.03	0.04	0.4	0.8	10	1	307.06	0.08943
30	0.1	0.7	1	1	0.03	0.04	0.4	0.8	10	1	217.86	0.06764
30	0.1	0.9	1	1	0.03	0.04	0.4	0.4	10	1	467.82	0.13031
30	0.01	0.4	1	1	0.03	0.04	0.4	0.6	10	1	144.46	0.04258
30	0.1	0.9	1	1	0.03	0.04	0.4	0.5	10	1	467.22	0.12795
30	0.01	0.4	1	1	0.03	0.04	0.4	0.7	10	1	146.65	0.04274
30	0.1	0.9	1	1	0.03	0.04	0.4	0.8	10	1	449.71	0.11819
30	0.1	0.7	1	1	0.03	0.04	0.4	0.5	10	1	225.69	0.07028
30	0.1	0.7	1	1	0.03	0.04	0.4	0.9	10	1	222.66	0.06874
30	0.7	0.99	1	1	0.03	0.04	0.4	0	10	1	1909.1	0.133
30	0.01	0.9	1	1	0.03	0.04	0.4	0.2	10	1	460.88	0.13597
30	0.3	0.99	1	1	0.03	0.04	0.4	0.7	10	1	1099.9	0.11092
30	0.1	0.7	1	1	0.03	0.04	0.4	0.1	10	1	223.05	0.07037
30	0.1	0.9	1	1	0.03	0.04	0.4	0.3	10	1	476.05	0.13445
30	0.2	0.8	1	1	0.03	0.04	0.4	0.9	10	1	298.09	0.08569
30	0.01	0.9	1	1	0.03	0.04	0.4	0.1	10	1	470.13	0.14102
30	0.7	0.99	1	1	0.03	0.04	0.4	0.5	10	1	1764.8	0.11233
30	0.99	0.01	1	1	0.03	0.04	0.4	0	10	1	1132.6	0.00103
30	0.1	0.9	1	1	0.03	0.04	0.4	0.2	10	1	480.4	0.13654
30	0.2	0.8	1	1	0.03	0.04	0.4	0.3	10	1	303.28	0.09136
30	0.01	0.9	1	1	0.03	0.04	0.4	0	10	1	471.01	0.14413
30	0.2	0.8	1	1	0.03	0.04	0.4	0.4	10	1	304.15	0.09052
30	0.1	0.9	1	1	0.03	0.04	0.4	0.7	10	1	450.12	0.1194
30	0.99	0.6	1	1	0.03	0.04	0.4	0.4	10	1	2129.9	0.00255
30	0.01	0.9	1	1	0.03	0.04	0.4	0.6	10	1	447.41	0.12566
30	0.2	0.8	1	1	0.03	0.04	0.4	0.1	10	1	306.42	0.09292
30	0.2	0.8	1	1	0.03	0.04	0.4	0	10	1	307.58	0.09431
30	0.4	0.99	1	1	0.03	0.04	0.4	0.1	10	1	1363.4	0.14668
30	0.01	0.8	1	1	0.03	0.04	0.4	0.2	10	1	290.6	0.09845
30	0.4	0.9	1	1	0.03	0.04	0.4	0	10	1	526	0.12812
30	0.4	0.9	1	1	0.03	0.04	0.4	0.7	10	1	505.31	0.11517
30	0.01	0.6	1	1	0.03	0.04	0.4	0.8	10	1	179.46	0.05719
30	0.4	0.9	1	1	0.03	0.04	0.4	0.3	10	1	510.71	0.12048
30	0.01	0.6	1	1	0.03	0.04	0.4	0.7	10	1	179.19	0.0574
30	0.99	0.8	1	1	0.03	0.04	0.4	0	10	1	3054.4	0.00342
30	0.6	0.99	1	1	0.03	0.04	0.4	0.3	10	1	1616.5	0.1297
30	0.99	0.8	1	1	0.03	0.04	0.4	0.5	10	1	3126.2	0.00592
30	0.01	0.01	1	1	0.03	0.04	0.4	0.8	10	1	210.48	0.03351
30	0.4	0.9	1	1	0.03	0.04	0.4	0.6	10	1	509.58	0.11661
30	0.4	0.9	1	1	0.03	0.04	0.4	0.4	10	1	523.41	0.1226
30	0.01	0.7	1	1	0.03	0.04	0.4	0.6	10	1	212.15	0.0712
30	0.5	0.99	1	1	0.03	0.04	0.4	0.8	10	1	1310.6	0.10937
30	0.01	0.7	1	1	0.03	0.04	0.4	0.4	10	1	216.26	0.07248
30	0.01	0.7	1	1	0.03	0.04	0.4	0.5	10	1	212.88	0.07083
30	0.01	0.7	1	1	0.03	0.04	0.4	0	10	1	215.67	0.0738
30	0.01	0.7	1	1	0.03	0.04	0.4	0.2	10	1	214.07	0.07227
30	0.01	0.7	1	1	0.03	0.04	0.4	0.1	10	1	216.87	0.07252
30	0.01	0.7	1	1	0.03	0.04	0.4	0.8	10	1	215.36	0.07051
30	0.4	0.99	1	1	0.03	0.04	0.4	0	10	1	1395.5	0.15284
30	0.3	0.99	1	1	0.03	0.04	0.4	0.6	10	1	1147	0.11987
30	0.1	0.8	1	1	0.03	0.04	0.4	0.9	10	1	290.4	0.09057
30	0.99	0.1	1	1	0.03	0.04	0.4	0.8	10	1	1426.4	0.00601
30	0.1	0.8	1	1	0.03	0.04	0.4	0.7	10	1	289.7	0.09086
30	0.01	0.01	1	1	0.03	0.04	0.4	0.2	10	1	206.91	0.03287
30	0.99	0.8	1	1	0.03	0.04	0.4	0.1	10	1	3046.1	0.00365
30	0.99	0.4	1	1	0.03	0.04	0.4	0.4	10	1	1689.6	0.00256
30	0.01	0.01	1	1	0.03	0.04	0.4	0.3	10	1	213.1	0.03337
30	0.01	0.8	1	1	0.03	0.04	0.4	0.9	10	1	277.99	0.08875
30	0.01	0.8	1	1	0.03	0.04	0.4	0.8	10	1	279.37	0.09059
30	0.01	0.01	1	1	0.03	0.04	0.4	0.7	10	1	214.03	0.03338
30	0.01	0.99	1	1	0.03	0.04	0.4	0.6	10	1	733.81	0.08899
30	0.01	0.01	1	1	0.03	0.04	0.4	0.9	10	1	211.91	0.03371
30	0.01	0.9	1	1	0.03	0.04	0.4	0.5	10	1	454.38	0.12826
30	0.4	0.99	1	1	0.03	0.04	0.4	0.7	10	1	1215.1	0.1151
30	0.5	0.9	1	1	0.03	0.04	0.4	0.3	10	1	539.49	0.11613
30	0.99	0.01	1	1	0.03	0.04	0.4	0.4	10	1	1234.3	0.00259
30	0.99	0.4	1	1	0.03	0.04	0.4	0.1	10	1	1614.8	0.00141
30	0.01	0.99	1	1	0.03	0.04	0.4	0.5	10	1	784.06	0.09998
30	0.99	0.5	1	1	0.03	0.04	0.4	0.9	10	1	1970.7	0.00497
30	0.01	0.8	1	1	0.03	0.04	0.4	0.6	10	1	279.27	0.09269
30	0.01	0.8	1	1	0.03	0.04	0.4	0	10	1	290.35	0.09867
30	0.01	0.8	1	1	0.03	0.04	0.4	0.4	10	1	289.42	0.09603
30	0.01	0.8	1	1	0.03	0.04	0.4	0.5	10	1	284.99	0.09618
30	0.99	0.1	1	1	0.03	0.04	0.4	0.1	10	1	1247.1	0.00135
30	0.1	0.9	1	1	0.03	0.04	0.4	0.6	10	1	457.3	0.12316
30	0.01	0.99	1	1	0.03	0.04	0.4	0.9	10	1	552.65	0.05704
30	0.5	0.99	1	1	0.03	0.04	0.4	0	10	1	1511.1	0.14722
30	0.4	0.99	1	1	0.03	0.04	0.4	0.5	10	1	1283.9	0.12683
30	0.6	0.99	1	1	0.03	0.04	0.4	0	10	1	1714.3	0.14385
30	0.2	0.9	1	1	0.03	0.04	0.4	0.4	10	1	485.5	0.12936
30	0.01	0.99	1	1	0.03	0.04	0.4	0.7	10	1	657.93	0.07611
30	0.99	0.01	1	1	0.03	0.04	0.4	0.6	10	1	1292.6	0.00425
30	0.99	0.1	1	1	0.03	0.04	0.4	0	10	1	1227	0.00127
30	0.8	0.99	1	1	0.03	0.04	0.4	0.1	10	1	2136.5	0.11165
30	0.01	0.99	1	1	0.03	0.04	0.4	0.3	10	1	896.55	0.12345
30	0.2	0.99	1	1	0.03	0.04	0.4	0.6	10	1	1022.6	0.11403
30	0.1	0.9	1	1	0.03	0.04	0.4	0	10	1	484.84	0.14282
30	0.01	0.99	1	1	0.03	0.04	0.4	0.4	10	1	840.95	0.11126
30	0.7	0.99	1	1	0.03	0.04	0.4	0.9	10	1	1618	0.09745
30	0.4	0.99	1	1	0.03	0.04	0.4	0.4	10	1	1310.5	0.13138
30	0.2	0.9	1	1	0.03	0.04	0.4	0.7	10	1	467.07	0.12009
30	0.2	0.99	1	1	0.03	0.04	0.4	0.7	10	1	1019.6	0.11043
30	0.01	0.9	1	1	0.03	0.04	0.4	0.3	10	1	461.92	0.13622
30	0.01	0.9	1	1	0.03	0.04	0.4	0.4	10	1	456.58	0.13221
30	0.01	0.99	1	1	0.03	0.04	0.4	0.2	10	1	943.28	0.13495
30	0.6	0.99	1	1	0.03	0.04	0.4	0.7	10	1	1480.3	0.11062
30	0.2	0.9	1	1	0.03	0.04	0.4	0.9	10	1	463.27	0.11398
30	0.5	0.99	1	1	0.03	0.04	0.4	0.2	10	1	1498.7	0.1413
30	0.2	0.9	1	1	0.03	0.04	0.4	0.2	10	1	495.5	0.13447
30	0.99	0.2	1	1	0.03	0.04	0.4	0.1	10	1	1342.2	0.00163
30	0.9	0.99	1	1	0.03	0.04	0.4	0.3	10	1	2244.1	0.07308
30	0.99	0.1	1	1	0.03	0.04	0.4	0.7	10	1	1402.1	0.00534
30	0.99	0.01	1	1	0.03	0.04	0.4	0.7	10	1	1323.4	0.00563
30	0.8	0.99	1	1	0.03	0.04	0.4	0.8	10	1	1821.4	0.08509
30	0.01	0.9	1	1	0.03	0.04	0.4	0.8	10	1	435.11	0.11697
30	0.99	0.6	1	1	0.03	0.04	0.4	0.5	10	1	2157.3	0.00298
30	0.99	0.5	1	1	0.03	0.04	0.4	0.5	10	1	1904.3	0.00312
30	0.1	0.9	1	1	0.03	0.04	0.4	0.1	10	1	480.88	0.13918
30	0.4	0.9	1	1	0.03	0.04	0.4	0.5	10	1	510.26	0.11786
30	0.99	0.1	1	1	0.03	0.04	0.4	0.4	10	1	1317.7	0.00307
30	0.01	0.9	1	1	0.03	0.04	0.4	0.9	10	1	433.13	0.11486
30	0.01	0.9	1	1	0.03	0.04	0.4	0.7	10	1	440.56	0.11994
30	0.6	0.99	1	1	0.03	0.04	0.4	0.6	10	1	1527.4	0.11607
30	0.2	0.99	1	1	0.03	0.04	0.4	0	10	1	1187.1	0.15811
30	0.9	0.99	1	1	0.03	0.04	0.4	0.8	10	1	2066.6	0.06308
30	0.99	0.6	1	1	0.03	0.04	0.4	0.6	10	1	2174.4	0.00356
30	0.8	0.99	1	1	0.03	0.04	0.4	0.6	10	1	1930.8	0.0943
30	0.99	0.1	1	1	0.03	0.04	0.4	0.6	10	1	1386.3	0.00384
30	0.99	0.2	1	1	0.03	0.04	0.4	0.2	10	1	1359.9	0.00175
30	0.99	0.01	1	1	0.03	0.04	0.4	0.9	10	1	1386.2	0.0085
30	0.99	0.2	1	1	0.03	0.04	0.4	0.6	10	1	1467.9	0.00393
30	0.7	0.99	1	1	0.03	0.04	0.4	0.4	10	1	1770.5	0.11628
30	0.99	0.9	1	1	0.03	0.04	0.4	0.1	10	1	3988.9	0.00929
30	0.01	0.99	1	1	0.03	0.04	0.4	0.8	10	1	606.15	0.06718
30	0.3	0.99	1	1	0.03	0.04	0.4	0.4	10	1	1183	0.13157
30	0.3	0.99	1	1	0.03	0.04	0.4	0.5	10	1	1156.8	0.12495
30	0.2	0.99	1	1	0.03	0.04	0.4	0.2	10	1	1144.9	0.14446
30	0.9	0.99	1	1	0.03	0.04	0.4	0.7	10	1	2097.9	0.06551
30	0.9	0.99	1	1	0.03	0.04	0.4	0.5	10	1	2148.6	0.06836
30	0.99	0.7	1	1	0.03	0.04	0.4	0	10	1	2466.9	0.00228
30	0.99	0.3	1	1	0.03	0.04	0.4	0.1	10	1	1469	0.00158
30	0.99	0.3	1	1	0.03	0.04	0.4	0.2	10	1	1498.8	0.00179
30	0.9	0.99	1	1	0.03	0.04	0.4	0.6	10	1	2137.6	0.06691
30	0.6	0.99	1	1	0.03	0.04	0.4	0.9	10	1	1446.3	0.10435
30	0.99	0.3	1	1	0.03	0.04	0.4	0.9	10	1	1658.3	0.00573
30	0.99	0.7	1	1	0.03	0.04	0.4	0.4	10	1	2524.8	0.00309
30	0.2	0.99	1	1	0.03	0.04	0.4	0.5	10	1	1068.4	0.1221
30	0.4	0.99	1	1	0.03	0.04	0.4	0.6	10	1	1255.3	0.12042
30	0.1	0.99	1	1	0.03	0.04	0.4	0.7	10	1	889.19	0.10107
30	0.1	0.99	1	1	0.03	0.04	0.4	0.1	10	1	1081.6	0.1498
30	0.01	0.99	1	1	0.03	0.04	0.4	0	10	1	1037.9	0.16
30	0.99	0.5	1	1	0.03	0.04	0.4	0.3	10	1	1867.9	0.00209
30	0.99	0.3	1	1	0.03	0.04	0.4	0.5	10	1	1551.3	0.0029
30	0.4	0.99	1	1	0.03	0.04	0.4	0.9	10	1	1142.5	0.10334
30	0.1	0.99	1	1	0.03	0.04	0.4	0.2	10	1	1046	0.14074
30	0.99	0.4	1	1	0.03	0.04	0.4	0	10	1	1614.7	0.0014
30	0.8	0.99	1	1	0.03	0.04	0.4	0.7	10	1	1877.6	0.09017
30	0.4	0.99	1	1	0.03	0.04	0.4	0.2	10	1	1342.3	0.14096
30	0.9	0.99	1	1	0.03	0.04	0.4	0.4	10	1	2191.5	0.07023
30	0.99	0.2	1	1	0.03	0.04	0.4	0.8	10	1	1527.8	0.00536
30	0.8	0.99	1	1	0.03	0.04	0.4	0.5	10	1	1957.5	0.09667
30	0.7	0.99	1	1	0.03	0.04	0.4	0.1	10	1	1874.6	0.12843
30	0.99	0.2	1	1	0.03	0.04	0.4	0.9	10	1	1557.1	0.00669
30	0.5	0.99	1	1	0.03	0.04	0.4	0.9	10	1	1300.8	0.10624
30	0.99	0.7	1	1	0.03	0.04	0.4	0.5	10	1	2530.9	0.00351
30	0.99	0.4	1	1	0.03	0.04	0.4	0.7	10	1	1737.5	0.00355
30	0.99	0.3	1	1	0.03	0.04	0.4	0.7	10	1	1611.3	0.0043
30	0.9	0.99	1	1	0.03	0.04	0.4	0	10	1	2341.5	0.07913
30	0.1	0.99	1	1	0.03	0.04	0.4	0.9	10	1	821.08	0.08452
30	0.99	0.9	1	1	0.03	0.04	0.4	0.4	10	1	3977.1	0.01089
30	0.99	0.4	1	1	0.03	0.04	0.4	0.3	10	1	1657.9	0.00237
30	0.99	0.4	1	1	0.03	0.04	0.4	0.6	10	1	1723.5	0.00313
30	0.1	0.99	1	1	0.03	0.04	0.4	0.8	10	1	848.22	0.0918
30	0.6	0.99	1	1	0.03	0.04	0.4	0.1	10	1	1684.8	0.13997
30	0.6	0.99	1	1	0.03	0.04	0.4	0.5	10	1	1577	0.12157
30	0.9	0.99	1	1	0.03	0.04	0.4	0.2	10	1	2271.8	0.07464
30	0.2	0.99	1	1	0.03	0.04	0.4	0.9	10	1	947.7	0.09431
30	0.2	0.99	1	1	0.03	0.04	0.4	0.8	10	1	979.93	0.10118
30	0.4	0.99	1	1	0.03	0.04	0.4	0.8	10	1	1189.3	0.10947
30	0.4	0.99	1	1	0.03	0.04	0.4	0.3	10	1	1310.2	0.13567
30	0.9	0.99	1	1	0.03	0.04	0.4	0.1	10	1	2298.1	0.07748
30	0.99	0.8	1	1	0.03	0.04	0.4	0.3	10	1	3068	0.00443
30	0.8	0.99	1	1	0.03	0.04	0.4	0.4	10	1	2010.8	0.10067
30	0.5	0.99	1	1	0.03	0.04	0.4	0.7	10	1	1336.9	0.11355
30	0.7	0.99	1	1	0.03	0.04	0.4	0.3	10	1	1837.4	0.12287
30	0.99	0.7	1	1	0.03	0.04	0.4	0.9	10	1	2583	0.00547
30	0.5	0.99	1	1	0.03	0.04	0.4	0.4	10	1	1442.5	0.13173
30	0.7	0.99	1	1	0.03	0.04	0.4	0.6	10	1	1717.5	0.10959
30	0.7	0.99	1	1	0.03	0.04	0.4	0.2	10	1	1837.8	0.12404
30	0.1	0.99	1	1	0.03	0.04	0.4	0.5	10	1	969.16	0.11897
30	0.99	0.9	1	1	0.03	0.04	0.4	0.8	10	1	4065.1	0.01382
30	0.1	0.99	1	1	0.03	0.04	0.4	0.4	10	1	986.85	0.12562
30	0.1	0.99	1	1	0.03	0.04	0.4	0.6	10	1	923.04	0.10822
30	0.8	0.99	1	1	0.03	0.04	0.4	0	10	1	2115.4	0.11226
30	0.1	0.99	1	1	0.03	0.04	0.4	0	10	1	1110	0.15873
30	0.99	0.6	1	1	0.03	0.04	0.4	0.7	10	1	2188.6	0.00413
30	0.2	0.99	1	1	0.03	0.04	0.4	0.4	10	1	1086.4	0.12921
30	0.7	0.99	1	1	0.03	0.04	0.4	0.7	10	1	1672.8	0.10421
30	0.2	0.99	1	1	0.03	0.04	0.4	0.3	10	1	1125.9	0.13791
30	0.99	0.2	1	1	0.03	0.04	0.4	0.3	10	1	1396.3	0.0023
30	0.6	0.99	1	1	0.03	0.04	0.4	0.2	10	1	1646	0.13415
30	0.5	0.99	1	1	0.03	0.04	0.4	0.6	10	1	1366.4	0.11841
30	0.99	0.7	1	1	0.03	0.04	0.4	0.8	10	1	2575.3	0.0051
30	0.99	0.5	1	1	0.03	0.04	0.4	0.6	10	1	1914.5	0.00293
30	0.3	0.99	1	1	0.03	0.04	0.4	0.1	10	1	1264.2	0.14981
30	0.3	0.99	1	1	0.03	0.04	0.4	0.3	10	1	1215.1	0.13731
30	0.5	0.99	1	1	0.03	0.04	0.4	0.5	10	1	1409.8	0.12445
30	0.2	0.99	1	1	0.03	0.04	0.4	0.1	10	1	1169.9	0.15203
30	0.3	0.99	1	1	0.03	0.04	0.4	0	10	1	1279.5	0.15506
30	0.99	0.4	1	1	0.03	0.04	0.4	0.8	10	1	1760.1	0.00444
30	0.3	0.99	1	1	0.03	0.04	0.4	0.2	10	1	1249	0.14431
30	0.99	0.99	1	1	0.03	0.04	0.4	0.1	10	1	5617.8	0.03259
30	0.99	0.2	1	1	0.03	0.04	0.4	0.5	10	1	1449	0.00312
30	0.99	0.1	1	1	0.03	0.04	0.4	0.9	10	1	1462.1	0.00753
30	0.01	0.99	1	1	0.03	0.04	0.4	0.1	10	1	991.86	0.14728
30	0.99	0.2	1	1	0.03	0.04	0.4	0.7	10	1	1502.1	0.00445
30	0.99	0.6	1	1	0.03	0.04	0.4	0.2	10	1	2102.8	0.00222
30	0.99	0.9	1	1	0.03	0.04	0.4	0.3	10	1	3992.3	0.01077
30	0.99	0.99	1	1	0.03	0.04	0.4	0.6	10	1	5634.9	0.03329
30	0.99	0.9	1	1	0.03	0.04	0.4	0.7	10	1	4060.5	0.01357
30	0.1	0.99	1	1	0.03	0.04	0.4	0.3	10	1	1022.5	0.13478
30	0.99	0.6	1	1	0.03	0.04	0.4	0.3	10	1	2140.4	0.0025
30	0.5	0.99	1	1	0.03	0.04	0.4	0.1	10	1	1524.3	0.14472
30	0.99	0.99	1	1	0.03	0.04	0.4	0.9	10	1	5607	0.03367
30	0.99	0.99	1	1	0.03	0.04	0.4	0.8	10	1	5661.5	0.03368
30	0.99	0.6	1	1	0.03	0.04	0.4	0.8	10	1	2197.5	0.00444
30	0.99	0.9	1	1	0.03	0.04	0.4	0.9	10	1	4084.4	0.01601
30	0.99	0.8	1	1	0.03	0.04	0.4	0.2	10	1	3091.5	0.00428
30	0.99	0.7	1	1	0.03	0.04	0.4	0.7	10	1	2561.8	0.00439
30	0.99	0.99	1	1	0.03	0.04	0.4	0.2	10	1	5623.5	0.034
30	0.99	0.99	1	1	0.03	0.04	0.4	0	10	1	5617.5	0.03282
30	0.99	0.7	1	1	0.03	0.04	0.4	0.6	10	1	2542.3	0.00383
30	0.99	0.7	1	1	0.03	0.04	0.4	0.1	10	1	2473.6	0.00227
30	0.99	0.7	1	1	0.03	0.04	0.4	0.3	10	1	2494.4	0.0027
30	0.99	0.7	1	1	0.03	0.04	0.4	0.2	10	1	2507.7	0.00248
30	0.99	0.6	1	1	0.03	0.04	0.4	0.9	10	1	2235.5	0.00506
30	0.99	0.99	1	1	0.03	0.04	0.4	0.3	10	1	5635.3	0.03295
30	0.99	0.99	1	1	0.03	0.04	0.4	0.7	10	1	5591.1	0.03351
30	0.99	0.8	1	1	0.03	0.04	0.4	0.9	10	1	3182.9	0.00818
30	0.99	0.9	1	1	0.03	0.04	0.4	0.2	10	1	4013.5	0.01019
30	0.99	0.9	1	1	0.03	0.04	0.4	0	10	1	3974.3	0.00902
30	0.99	0.9	1	1	0.03	0.04	0.4	0.6	10	1	4070.6	0.01291
30	0.99	0.8	1	1	0.03	0.04	0.4	0.6	10	1	3073.4	0.00556
30	0.99	0.8	1	1	0.03	0.04	0.4	0.4	10	1	3105.2	0.00503
30	0.99	0.8	1	1	0.03	0.04	0.4	0.7	10	1	3120.4	0.0069
30	0.99	0.8	1	1	0.03	0.04	0.4	0.8	10	1	3169	0.00729
30	0.99	0.99	1	1	0.03	0.04	0.4	0.4	10	1	5585.2	0.0332
30	0.99	0.99	1	1	0.03	0.04	0.4	0.5	10	1	5701	0.03396
30	0.99	0.9	1	1	0.03	0.04	0.4	0.5	10	1	4030.6	0.01199
